# **Sirtuin-1 Sensitive Lysine-136 Acetylation Drives Phase Separation and Pathological Aggregation of TDP-43**

Jorge Garcia Morato<sup>1,2</sup>, Friederike Hans<sup>1,2</sup>, Felix von Zweyendorf<sup>2</sup>, Regina Feederle<sup>3,4</sup>, Simon J. Elsässer<sup>5</sup>, Angelos A. Skodras<sup>6</sup>, Christian Johannes Gloeckner<sup>2,7</sup>, Emanuele Buratti<sup>8</sup>, Manuela Neumann<sup>2,9</sup>, Philipp J. Kahle<sup>1,2, \*</sup>

<sup>1</sup> Laboratory of Functional Neurogenetics, Department of Neurodegeneration, Hertie Institute for Clinical Brain Research, University of Tübingen, 72076 Tübingen, Germany

<sup>2</sup> German Center for Neurodegenerative Diseases (DZNE), 72076 Tübingen, Germany

<sup>3</sup> Institute for Diabetes and Obesity, Monoclonal Antibody Core Facility and Research Group, Helmholtz Zentrum München, 85764 Neuherberg, Germany

<sup>4</sup> German Center for Neurodegenerative Diseases (DZNE), 81377 München, Germany

<sup>5</sup> Science for Life Laboratory, Department of Medical Biochemistry and Biophysics, Karolinska Institutet, 17165 Stockholm, Sweden

<sup>6</sup> Molecular Imaging Unit, Department of Cellular Neurology, Hertie Institute for Clinical Brain Research, University of Tübingen, 72076 Tübingen, Germany

<sup>7</sup> Core Facility for Medical Bioanalytics (CFMB), Institute for Ophthalmic Research, Center for Ophthalmology, University of Tübingen, 72076 Tübingen, Germany

<sup>8</sup> International Centre for Genetic Engineering and Biotechnology (ICGEB), 34149 Trieste, Italy

<sup>9</sup> Department of Neuropathology, University Hospital, 72076 Tübingen, Germany

\* Corresponding author. Tel: +49 7071 29-81970; E-mail: philipp.kahle@uni-tuebingen.de

## Abstract

The trans-activation response DNA-binding protein TDP-43 regulates RNA processing and forms neuropathological aggregates in patients with amyotrophic lateral sclerosis and frontotemporal lobar degeneration. Investigating TDP-43 post-translational modifications, we discovered that K84 acetylation reduced nuclear import whereas K136 acetylation impaired RNA binding and splicing capabilities of TDP-43. Such failure of RNA interaction triggered TDP-43 phase separation mediated by the C-terminal low complexity domain, leading to the formation of insoluble aggregates with pathologically phosphorylated and ubiquitinated TDP-43. Confirming the results from site-directed mutagenesis, we succeeded to introduce authentic acetyl-lysine at the identified sites via amber suppression. [AcK84]TDP-43 showed cytoplasmic mislocalization and the aggregation propensity of [acK136]TDP-43 was confirmed. With newly developed antibodies, we found that the nuclear sirtuin SIRT1 can potently deacetylate [acK136]TDP-43. Moreover, SIRT1 reduced the aggregation propensity of [acK136]TDP-43. Thus, distinct lysine acetylations modulate nuclear import, RNA binding and phase separation of TDP-43, suggesting novel regulatory mechanisms for TDP-43 pathogenesis.

## Introduction

The trans-activation response DNA-binding protein of 43kDa (TDP-43) regulates various RNA processing steps<sup>1-3</sup> and is found in the neuropathological lesions of patients with amyotrophic lateral sclerosis (ALS) and frontotemporal lobar degeneration (FTLD)<sup>4,5</sup>. The TDP-43 polypeptide contains two RNA recognition motifs (RRM1 and RRM2), a nuclear localisation signal (NLS) and a C-terminal glycine-rich low complexity domain (see Fig. 1a). The NLS allows active nuclear import<sup>6</sup>, but TDP-43 can also shuttle between the nucleus and cytoplasm<sup>7,8</sup>. Through its RRM2s TDP-43 binds to UG-rich regions of RNA<sup>9,10</sup> and it is involved in RNA transport, stability, and splicing, for example exon 9 of the cystic fibrosis transmembrane conductance regulator (*CFTR*) mRNA<sup>11</sup>. The C-terminal low complexity domain of TDP-43 promotes liquid-liquid phase separation (LLPS) as well as pathological protein aggregation<sup>12</sup>. Post-translational

modifications (PTMs) can modulate TDP-43 functions in health and disease. Putative pathological PTMs of TDP-43 include C-terminal fragmentations and phosphorylations<sup>13</sup>, including the widely used marker pS409/410<sup>14,15</sup>. In addition lysine modifications have been reported, including ubiquitinations at various residues<sup>16</sup> and sumoylation and acetylation of the RRM1<sup>17,18</sup>. The putative acetyl-mimic [K145Q]TDP-43 was distributed in a stippled manner in transfected cells, eventually recapitulating pathological phosphorylation and recruitment of ALS-related factors into TDP-43 aggregates<sup>19</sup>. In addition, [K145Q]TDP-43 had reduced *CFTR* splicing activity. Thus, lysine modifications may be important for physiology and pathological aggregation of TDP-43. However, the genesis of TDP-43 aggregates remains elusive.

New research on LLPS is unveiling the molecular processes regulating the arrangement of membrane-less organelles. Heteronuclear ribonucleoprotein (hnRNP) LLPS is amply reported but whether and how this process is regulated in cells is poorly understood<sup>20</sup>. In the case of TDP-43, RNA binding prevents its phase separation *in vitro* and reduces droplet formation *in vivo*<sup>21</sup>. Wild-type (wt)TDP-43 is capable of going into liquid droplets but pathological mutants seem to form more resilient droplets. While the C-terminal glycine-rich domain of TDP-43 seems to play a crucial role in the formation of phase-separated droplets, the N-terminal domain may also contribute to the aggregation process<sup>22-24</sup>. Thus, the regulation of TDP-43 RNA binding could be pivotal in the pathophysiology of TDP-43. The molecular pathways regulating the disengagement from RNA are only beginning to be described.

In the present study we discovered that acetylation of K84 within the NLS reduced nuclear import whereas acetylation of K136 in the RNA recognition domain impaired TDP-43 RNA binding and splicing capabilities. Such failure of RNA interaction triggered TDP-43 phase separation mediated by the C-terminal low complexity domain, leading to the formation of insoluble aggregates with pathologically phosphorylated and ubiquitinated TDP-43. To confirm the results from site-directed mutagenesis, we expanded the genetic code via amber suppression to introduce authentic acetyl-lysine at the identified sites. Indeed, [ack84]TDP-43 showed cytoplasmic mislocalization, and the increased aggregation tendency for [ack136]TDP-43 was confirmed. With newly developed antibodies, we found that the

nuclear sirtuin SIRT1 can potentially deacetylate [acK136]TDP-43. Moreover, SIRT1 reduced the aggregation propensity of [acK136]TDP-43. Thus, distinct lysine acetylations regulate nuclear import, RNA binding and phase separation of TDP-43, suggesting novel mechanisms for TDP-43 pathogenesis.

## Results

### Detection of TDP-43 acetylation

After investigating the sites of TDP-43 lysine ubiquitinations<sup>16</sup>, we became interested in how other PTMs could affect TDP-43 functionality and aggregation. Recently acetylation has been linked with TDP-43 pathology<sup>18,19</sup>, and lysine acetylation has the potential to disrupt ubiquitination by competing for the same residue. To explore this hypothesis more in depth, we re-examined the mass spectrometry data<sup>16</sup> specifically for acetylated lysines. We found in transfected HEK293E cells that 6xHis-tagged wtTDP-43 was acetylated at lysine residues K79 and K84 around the NLS and K121 and K136 in RRM1 (Fig. 1a). We could not detect the previously published acetylations at K145 and K192<sup>18</sup>, perhaps due to slight differences in experimental conditions (see discussion).

### Site-directed mutagenesis of TDP-43 acetyl-lysine sites

Each of the identified acetylated lysine residues was mutagenized to either arginine or glutamine to simulate the lack or the presence of acetylation, respectively. We first looked at the subcellular distribution of these N-terminally 6xHis-tagged TDP-43 mutants in transiently transfected HEK293E cells. Immunofluorescence staining of the 6xHis tag did not show visible deviation from the wtTDP-43 nuclear staining pattern for both acetyl-dead and acetyl-mimic mutations at residues K79 and K121 (Supplementary Fig. 1a). Likewise, the conservative [K84R]TDP-43 mutant remained mainly nuclear, but a substantial portion of acetyl-mimic [K84Q]TDP-43 was retained in the cytoplasm (Fig. 1b). Quantification showed a significant increase in the percentage of cells with cytoplasmically mislocalized [K84Q]TDP-43 (Fig. 1c). In addition, we performed two different biochemical nucleo-cytoplasmic fractionation assays to



support these results. There was a significant increase of [K84Q]TDP-43 in the cytoplasmic fraction when compared to wtTDP-43 (Supplementary Fig. 1b-d). Nevertheless, we could still observe a sizable amount of [K84Q]TDP-43 in the nuclear fraction, as for the [ $\Delta$ NLS]TDP-43 triple mutant. Thus, alterations at the NLS reduced but did not abolish TDP-43 nuclear import, accounting for the residual splicing activity in the nucleus (see Fig. 3e,f). By contrast, the acetyl-mimic K79Q substitution did not show evident changes in nucleocytoplasmic distribution of TDP-43, likely because K79 is localized just outside the NLS, whereas K84 is at the core of the NLS<sup>6,16</sup>.

The RRM1 mutants K136R and K136Q were predominantly localized in the nucleus, but a significant number of cells displayed a nuclear droplet-like pattern (Fig. 1b,c). This droplet-like nuclear distribution was reminiscent of the RNA-binding deficient F147L/F149L mutant TDP-43<sup>8,25</sup>. For comparison, we generated the previously described<sup>18,19</sup> acetyl-mimic K145Q mutant in RRM1, which showed the expected stippled distribution (Fig. 1b). As K136 is in direct contact with bound nucleic acids<sup>26,27</sup>, we assume that modifications at K136 disrupt nucleic acid binding and therefore disengage TDP-43 from hnRNP complex localizations. Such dissociated K136-modified TDP-43 may be free to phase separate and self-aggregate into inclusions.

### **K136 mutant TDP-43 is pathologically ubiquitinated, phosphorylated, and insoluble**

We examined if the K136 mutant TDP-43 inclusions in cell culture also showed pathological features described for human patients<sup>4,5,14,28</sup>. 6xHis-tagged TDP-43 variants were transiently transfected into HEK293E cells with stable knockdown of endogenous TDP-43 (sh<sup>TDP-43</sup>)<sup>29</sup> to minimize interference from the endogenous wtTDP-43. To assess protein solubility, RIPA-urea solubility fractionation assays were performed. While most of the 6xHis-tagged wtTDP-43 was RIPA-soluble, a larger portion of both K136R and K136Q TDP-43 mutants shifted into the RIPA-insoluble fraction (Fig. 2a). Although [F147L/F149L]TDP-43 formed similar intranuclear patches, this designed RNA-binding deficient mutant

was as soluble as endogenous TDP-43 (Fig. 2a). It should be noted that the Flag-tagged [F147L/F149L]TDP-43 was expressed at levels comparable to endogenous TDP-43 in non-silenced cells, whereas the 6xHis-tagged K136 mutants were expressed at higher levels.

To check for pathological PTMs, 6xHis-tagged TDP-43 variants were transiently transfected into sh<sup>TDP-43</sup>-HEK293E cells and purified using nickel beads. Both K136R and K136Q TDP-43 were ubiquitinated more strongly than wtTDP-43 even after proteasomal inhibition (Fig. 2b). In addition, K136R and K136Q mutant TDP-43 showed phosphorylation at the extreme C-terminal serine residues S409/410 detected with a phospho-specific antibody<sup>15</sup> (Fig 2b). This pathological phosphorylation was also visible at the nuclear inclusions of K136 mutant TDP-43 by immunostaining (Fig. 2c). Thus, the nuclear inclusions formed by K136 mutant TDP-43 recapitulate PTMs found in patients.

### **K136 mutant TDP-43 fails to bind RNA and lacks splicing activity**

Because K136 in the RRM1 is important for interaction with nucleic acids<sup>26,27</sup>, we hypothesised that alterations at position K136 could interfere with RNA binding of TDP-43 and alter its splicing capabilities. First, we performed a RNA-protein pulldown assay of TDP-43 with its preferred binding sequence poly-(UG)<sub>12</sub><sup>10</sup>. While wtTDP-43 strongly bound to synthetic poly-(UG)<sub>12</sub> but not the negative control poly-(UC)<sub>12</sub> RNA, the acetyl-mimic [K136Q]TDP-43 showed a reduction in RNA binding (Fig. 3a). Additionally, we measured the RNA-binding strength using a 2-filter trap assay using an excess of synthetic poly-(UG)<sub>12</sub> as target. The first nitrocellulose membrane will capture the biotinylated RNA probe only when bound to protein and the second nylon membrane captures the unbound flow-through RNA. This assay clearly showed the concentration-dependent formation of [wt]TDP-43 protein complex with poly-(UG)<sub>12</sub> RNA retained on the nitrocellulose membrane (Fig. 3b). In contrast, the acetyl-mimic [K136Q]TDP-43 had significantly reduced poly-(UG)<sub>12</sub> RNA binding strength (Fig. 2b-d).

To assess the splicing activity of TDP-43 in cells, we used the established *CFTR* minigene reporter assay<sup>11</sup>. To minimize the splicing activity of the endogenous wtTDP-43, we used sh<sup>TDP-43</sup>-HEK293E cells<sup>29</sup>. Mutant constructs of TDP-43 were co-transfected together with a plasmid containing exons 9-11 of *CFTR* in a minigene. In parental, non-silenced cells exon 9 was skipped, which was severely blunted in sh<sup>TDP-43</sup> cells (Fig. 3e). Ex9 splicing could be rescued by re-transfecting [wt]TDP-43 (Fig. 3e). The nuclear [K84R]TDP-43 rescued *CFTR* splicing to wild-type levels. [K84Q]TDP-43 rescued *CFTR* splicing activity to a lesser extent than wild-type or [K84R]TDP-43 (Fig. 2h). The reduced splice activity of the nuclear import impaired [K84Q]TDP-43 was similar to that of [ $\Delta$ NLS]TDP-43, suggesting that the residual nuclear TDP-43 (Fig. 1d) was sufficient to promote ex9 skipping. Indeed, in our experience very strong reduction of TDP-43 activity is necessary to cause loss of TDP-43 splice activity in cells. In contrast, both K136R and K136Q mutants showed significantly reduced *CFTR* exon 9 splicing (Fig. 3e,f), linking the formation of nuclear inclusions with TDP-43 loss of function. The previously described<sup>18,19</sup> K145Q mutant TDP-43 also showed some reduction of *CFTR* splice activity, although the effect was less pronounced than for the K136 mutants expressed at comparably high protein levels (Fig. 3e). Together, both *CFTR* splicing assay and RNA-protein pulldown show that alterations at position 136 severely perturb the RNA-binding and splicing capabilities of TDP-43.

It was puzzling that both the acetyl-mimic K136Q and the acetyl-dead K136R substitutions showed the same aggregation-promoting effects. The K136 residue may be in a structurally restrained position not tolerating even conservative amino acid substitutions. Indeed, the NMR structure of the TDP-43 RRMs complexed with RNA<sup>26</sup> revealed that the side chain of K136 is in close apposition to the nucleic acid and the key RNA-binding residues F147/F149 (Supplementary Fig. 2a). Moreover, K136 is within  $\approx 3\text{\AA}$  distance to Q134, L139 and T199, evidently forming a tight RNA-binding configuration that appears not to accommodate the larger guanidinium group of the otherwise conservative K136R substitution. Supplementary Fig. 2b highlights the K136 residue within the RRM1 bound to RNA. Modelling the acetyl-dead K136R mutation, which surprisingly caused similar aggregation propensities as the acetyl-mimicking K136Q substitution, revealed clashes with the protein backbone. Thus, classical site-directed mutagenesis

might introduce local perturbations to the RRM1 structure, which may not entirely reflect the effects of authentic lysine acetylation. Indeed, the model for [acK136]TDP-43 showed hardly any clashes with the protein backbone, but a collision with the bound RNA structure. In order to distinguish mutagenesis artefacts from authentic lysine acetylation effects, we needed to introduce acK at position 136 of TDP-43.

#### **Introduction of acetyl-lysine (acK) through amber suppression**

As K136 turned out to be a very delicate residue for site-directed mutagenesis, it was important to properly validate the pro-aggregative effects for [acK136]TDP-43. We succeeded to incorporate authentic acK at the apparently regulatory sites in TDP-43 with amber suppression methodology. TDP-43 mutants were generated with a C-terminal 6xHis tag and an amber stop codon (TAG) substituting the codon at position 84 and at position 136, respectively. Each of these plasmids were co-transfected into sh<sup>TDP-43</sup>-HEK293E cells, together with a plasmid containing a N-terminally Flag-tagged chimeric acetylated lysine RNA synthetase (AcRS) and four copies of tRNA<sub>TAG</sub><sup>30</sup>. Together the designed AcRS and the tRNA<sub>TAG</sub> will incorporate acK added to the media at the introduced amber stop codon, directly incorporating an acetylated lysine site-specifically during the protein translation.

In absence of acK, only truncated forms of TDP-43 were visible due to the introduction of the amber stop codons (Fig. 4a). After adding 5mM acK in the media for 24h, the constructs were translated beyond the amber sites such that full-length TDP-43 including the C-terminal 6xHis tag became detectable, confirming successful amber suppression (Fig. 4a). There was a reduction in the amount of truncated TDP-43 but it did not completely disappear, pointing out the slight inefficiency of the system when compared to endogenous tRNAs. The expression of amber-suppressed full-length mutant TDP-43 was not as high as that from a wtTDP-43 cDNA (Fig. 4a), but still robust. Importantly, [acK84]TDP-43 showed a similar reduction of nuclear import (Fig. 4b) as the K84Q mutant (Fig. 1b), and [acK136]TDP-43 showed the same spotty nuclear distribution (Fig. 4b) as the K136Q mutant (Fig. 1b). To check if the RNA splicing

capabilities of TDP-43 were compromised after introducing an acetylated lysine at position 136 in a similar manner to the K136R and K136Q mutants, we performed the *CFTR* minigene assay in sh<sup>TDP-43</sup>-HEK293E cells. Indeed, [acK136]TDP-43 could only partially rescue *CFTR* exon 9 splicing (Fig. 4c). In addition, we also introduced acetylated lysine at K79 and K121 (Supplementary Fig. 3). As expected from the point mutations (Supplementary Fig. 1a), [acK79]TDP-43 and [acK121]TDP-43 did not show any different distribution than wtTDP-43. Taken together, the acetyl-mimic lysine-to-glutamine substitutions did reflect authentic lysine acetylation properties, as confirmed by amber suppression introduction of acK directly.

We were then interested if [acK136]TDP-43 could form phase-separated droplets or even aggregates in the cytoplasm, the most common site where human neuropathological TDP-43 is found<sup>31</sup>. To study this, we disrupted the NLS<sup>6</sup> in the construct ΔNLS-K136<sub>TAG</sub>. [AcK136]TDP-43ΔNLS was uniformly distributed throughout the cytoplasm in most cells. However, there was a fraction of cells developing multiple cytoplasmic aggregates (Fig. 4e,f). Thus, when nuclear import is impaired, K136 acetylation may also promote aggregation of cytosolically mislocalized TDP-43. Next, we deleted the C-terminus in the construct ΔC-K136<sub>TAG</sub> because the C-terminal low complexity domain mediates LLPS and aggregation of TDP-43<sup>32</sup>. [acK136]TDP-43ΔC showed a homogeneous nuclear distribution (Fig. 4e,f), confirming that the C-terminal part of TDP-43 plays a crucial role in phase separation and aggregation.

## FRAP analysis and dynamics of K136 mutant TDP-43 aggregation

As we confirmed that [K136Q]TDP-43 showed the same properties as amber suppressed [acK136]TDP-43, we characterized in greater detail the aggregation process of a C-terminally EGFP-tagged [K136Q]TDP-43 construct. First we measured protein motility in the droplet-like inclusions by fluorescence recovery after photobleaching assay (FRAP). HEK293E cells were transfected with either wtTDP-43-EGFP or [K136Q]TDP-43-EGFP. Then regions of interest (ROI) with bleached for half a second by 488nm laser light irradiation and allowed to recover (Fig. 5a). The wtTDP-43-EGFP showed recovery within a

minute after photobleaching (Fig. 5b), consistent with the motility of TDP-43 in the nucleus<sup>21</sup>. By contrast, two types of less mobile pools of [K136Q]TDP-43-EGFP were detected (Fig. 5b). Large [K136Q]TDP-43-EGFP aggregates ( $\phi \geq 1\mu\text{m}$ ) did not recover for up to 3min recording (Fig. 5b), likely constituting solid aggregates. The smaller punctae ( $\phi \leq 0.5\mu\text{m}$ ) showed a significantly slower recovery than the wtTDP-43 with an immobile fraction not recovering at all (Fig. 5b-c), indicative of LLPS<sup>21</sup>.

To investigate the kinetics of LLPS and protein aggregation, we performed long-term live imaging of [K136Q]TDP-43-EGFP. Transfected HEK293E cells were imaged for several hours and the distribution of TDP-43 was monitored. [K136Q]TDP-43 was recorded going into phase separation, forming droplets and these droplets were seen fusing with one another (Fig. 5d and Supplementary Videos 1-3). To examine the [K136Q]TDP-43 aggregate-formation kinetics in detail we quantified the size of aggregates in HEK293E cells fixed 24, 48 and 72 hours after transfection. The quantification showed that after 48 hours there was an increase in the percentage of TDP-43 aggregates larger than  $10\mu\text{m}$ , and the size difference became significant after 72 hours (Fig 5e). Together, these results suggest that the aggregation of TDP-43 is a dynamic process from a diffuse distribution to phase separation, eventually towards larger solid aggregates.

### **Generation of site-specific antibodies against lysine acetylated TDP-43**

To study the acetylated forms of TDP-43 in greater detail, we developed rat monoclonal antibodies against acK84 and acK136 TDP-43. Two clones were selected that recognized with high sensitivity their corresponding amber suppressed TDP-43 targets (Fig. 6a,b) in Western blots, with a very faint band visible in the wtTDP43 lane. The antibodies did not recognize K84R or K136R TDP-43 mutants, respectively. Both antibodies were also capable of detecting the corresponding lysine acetylated forms of TDP-43 by immunofluorescence staining (Fig. 6c,d).

## **SIRT1 can deacetylate [acK136]TDP-43 and revert its aggregation propensity**

The newly generated antibodies allowed us to check for enzymes that could deacetylate [acK136]TDP-43. In humans, there are 18 protein lysine deacetylases<sup>33</sup>. First we tested the histone deacetylases (HDACs) 1-8, representing class I and class II deacetylases. Each of these HDACs was cotransfected into amber suppressed [acK136]TDP-43 cells. None of the HDAC1-8 effectively reduced TDP-43 K136 acetylation, (Supplementary Fig. 4a). However, the results for Myc-tagged HDAC1 and HDAC6 were somewhat inconclusive as their expression interfered with the amber suppression efficiency for [acK136]TDP-43 expression (Supplementary Fig. 4b). Next, we tested all class III deacetylases (sirtuins), also because of their involvement in neurodegenerative diseases including ALS<sup>34</sup>. Flag-tagged SIRT1-7 were co-transfected with K136<sub>TAG</sub> and the deacetylation effects on amber-suppressed [acK136]TDP-43 were probed with the acetylation-specific antibody. Among the 7 sirtuins, only SIRT1 and SIRT2 strongly reduced [acK136]TDP-43 immunoreactivity (Supplementary Fig. 4c). To confirm that the reduction in K136 acetylation was truly caused by the deacetylation activity of these sirtuins, we repeated the experiment in the presence of Ex527, a selective Sirt1 and to a lesser extent Sirt2 inhibitor. Indeed, treatment with Ex527 dose-dependently reduced the deacetylation of [acK136]TDP-43 by SIRT1 and SIRT2 (Fig 7a). [AcK136]TDP-43 deacetylation was observed after extreme overexpression of the mainly cytoplasmic NAD<sup>+</sup> dependent deacetylase SIRT2<sup>33</sup>, so we cannot rule out overexpression artefacts. However, moderate levels of the nuclear deacetylase SIRT1<sup>33</sup> were sufficient to counteract TDP-43 acetylation at K136. It is of note that TDP-43 was reported to bind to the 3'-UTR of SIRT1 mRNA and regulate SIRT1 expression<sup>35</sup>. Thus, the nuclear deacetylase SIRT1 may be engaged in a regulatory network with TDP-43. To see if the reduction of acetylation correlated with a reduction in the amount of aggregates of [acK136]TDP-43, we cotransfected those sirtuins with an impact in TDP-43 acetylation (SIRT1 and SIRT2) as well as other sirtuins with similar level of expression (SIRT3 and SIRT6). When compared to cells without any sirtuin overexpression, SIRT1 and 2 caused a significant reduction in the number of cells with inclusions, even though some level of TDP-43 acetylation was detected (Fig. 7b, c).



## Discussion

In ALS only 4% of familial cases have mutations on TDP-43 and they are even rarer in FTLD (<1%)<sup>36,37</sup>. PTMs of wtTDP-43 might promote disease but it is still unknown if they are a cause or consequence of TDP-43 aggregation<sup>4,18</sup>. Here we show that TDP-43 nuclear import and RNA binding are dynamic processes that can be regulated by distinct PTMs. Specifically, we have discovered that acetylation of the core NLS residue K84 partially reduces nuclear import of TDP-43, leading to the accumulation of cytosolically mislocalized protein, which is considered as an early step of TDP-43 pathogenesis. Moreover, we identify K136 in the RRM1 as a potential regulatory site for TDP-43 RNA binding and splicing activity. Although we could confirm the stippled distribution and reduced *CFTR* splicing activity for the previously reported [K145Q]TDP-43<sup>18,19</sup>, the effects for K136 located directly within an essential RRM1 site appeared stronger in our experimental system. Acetylation can modulate the binding to RNA of other hnRNPs and therefore likely for TDP-43 as well<sup>38,39</sup>. Such loss of functional RNA binding may lead to LLPS and eventually the formation of intranuclear TDP-43 aggregates. Acetylation of lysine residues in the RRM1 could trigger aggregation of TDP-43, driving it into phase-separated droplets that eventually coalesce into bigger aggregates. This was also very recently proposed by Yu et al. who looked at [K145Q/K192Q]TDP-43, two acetylation sites that interfere with TDP-43 RNA-processing functions<sup>40</sup>. The phase-separated [K145Q/K192Q]TDP-43 can become less fluid and presumably turn into solid aggregates. Our findings support this progression for [acK136]TDP-43 and identify SIRT1 as a deacetylase counteracting this process. When combined with  $\Delta$ NLS, [acK136]TDP-43 also showed a tendency to form cytosolic aggregates, which are much more commonly found in human patients than intranuclear inclusions<sup>41</sup>. Thus, acetylation of K136 might disengage TDP-43 from functional hnRNP complexes, liberating the protein to unmix into liquid phases. Such LLPS transitions may lead to TDP-43 self-aggregation and the formation of pathological inclusions. The observation that SIRT1 can deacetylate [acK136]TDP-43 indicates that this is a dynamic process that can be regulated in cells. The balance of TDP-43 protein lysine acetyltransferases and deacetylases might determine its physiological functions and when derailed, could lead to LLPS and pathological TDP-43 aggregation in disease. Modulation of this pathway could offer novel therapeutic approaches for the treatment of FTLD and ALS.



307

308 Residue K136 was recently discovered as a potential TDP-43 sumoylation site<sup>17</sup>. Consistent with this  
 309 study by Maurel et al. (2020) using TDP-43 GFP fusion proteins, we found that 6xHis-tagged  
 310 [K136R]TDP-43 formed intranuclear inclusions. The similarities in behaviour between K136R and K136Q  
 311 TDP-43 mutants were puzzling, suggesting that instead of mimicking the presence or lack of acetylation,  
 312 the mutants were introducing backbone changes in TDP-43. Point mutagenesis is a broadly used  
 313 approach to study the cellular effects of protein lysine acetylation but in some cases can fail to rescue  
 314 protein function<sup>42</sup>. In addition, glutamine and arginine contain delocalized electrons that are critical for the  
 315 formation of phase-separated entities<sup>43</sup>. This provides an explanation for the stronger occurrence of  
 316 phosphorylated aggregates in K136R/Q TDP-43. Amber suppression has its own disadvantages in terms  
 317 of efficiency and availability of synthetic amino acids, in addition to the possibility of side effects.  
 318 Transcriptomic analysis of stably amber suppressed cells does not show upregulation of ER stress  
 319 markers<sup>44</sup>. Another benefit of this approach is the possibility of removing the modification *in vivo* via  
 320 deacetylases (see Fig. 7).

321

322 Unfortunately, we could not detect phosphorylation and ubiquitination of the amber suppressed  
 323 [acK136]TDP-43 (not shown), in contrast to the K136Q mutant TDP-43. We think there are three factors  
 324 that can influence this result. First, compared with transfected mutant [K136Q]TDP-43, expression of  
 325 amber suppressed TDP-43 is much lower (see Fig. 6a), potentially below detection limit of other PTMs.  
 326 The lower concentration might also not be sufficient to seed protein aggregation, phosphorylation and  
 327 ubiquitination. Second, K136-acetyl in the amber suppressed TDP-43 can be removed by endogenous  
 328 deacetylases such as SIRT1. This would attenuate any downstream effects of this acetylation. And third,  
 329 as shown by Wang et al. glutamines favour the hardening of phase-separated RNA-binding molecules<sup>22</sup>.  
 330 While these key differences could be behind the lack of the strongest markers of TDP-43, amber  
 331 suppression still could help identifying K136 as a residue crucial for RNA splicing and LLPS in TDP-43.

332

In our MS analysis we did not detect the previously reported acetylations at K145 and K192 in the RNA-binding domain of TDP-43<sup>18</sup>. Although our experimental setups were similar, perhaps the use of the protein aggregation optimized QBI-293 subclone in their studies made the difference, whereas our study in HEK293E cells revealed acetylation of K121 and K136 in RRM1. Moreover, the MS detection of K145 acetylation was done with  $\Delta$ NLS mutant TDP-43<sup>18,19</sup> lacking the K84 acetylation site we detected with wtTDP-43. It is possible that differential lysine acetylation events occur in cytosolic and nuclear TDP-43 pools. Antibodies directed against [acK145]TDP-43 stained neuropathological inclusions in ALS but not FTLD-TDP<sup>18</sup>. Yet, MS analysis of TDP-43 PTMs in 2 ALS cases failed to confirm all of these lysine acetylations but instead found K82 acetylation in one ALS case<sup>45</sup>. Unfortunately, the acK136 peptide is poorly immunogenic, and we obtained only one single hybridoma clone that produced antibody with sufficient selectivity and sensitivity for our cell culture experiments, but not for human disease samples (not shown). Thus, the human disease relevance for lysine acetylated TDP-43 remains to be proven.

## Materials and Methods

### Antibodies

In this study the following antibodies were used for Western blot (WB) and immunofluorescence staining (IF): rat anti-[acK84]TDP-43 (WB, 1:10 supernatant; IF, 1:2; this work), rat anti-[acK136]TDP-43 (WB, 1:10 supernatant; IF, 1:2; this work; mouse anti-6xHis (WB, 1:10000; IF, 1:1000; Amersham 27-4710-01), rabbit pan-acetylated lysine (WB, 1:1000; Cell Signalling #9441), rabbit mAb mix pan-acetylated lysine (WB, 1:1000; Ac-K-100, Cell Signalling #9841), mouse anti-Flag HRP-coupled (WB, 1:10000; Sigma #A8592), mouse anti-GAPDH (WB, 1:50000; clone 6C5, Biodesign International #H86504M), rabbit anti-Hsp90 (WB, 1:1000; Cell Signalling #4874), rat anti-[pS409/410]TDP-43 (WB, 1:10; IF, 1:50; clone 1D3), rabbit anti-TDP-43 (WB, 1:8000; IF, 1:1000; ProteinTech 10782-2-AP), mouse anti-TDP-43 (WB, 1:2000; IF, 1:1000; Abnova #H00023435), mouse anti-tubulin (WB, 1:10000; Sigma #T-5168), mouse anti-ubiquitin (WB, 1:4000; Millipore #MAB1510), mouse anti-YY1 (WB, 1:2000; clone H-10, Santa Cruz Biotechnology #7341), mouse anti-hnRNPA1 (WB, 1:2000; clone R196, Cell Signaling #5380), mouse anti- $\beta$ -actin (WB,

1:50000; clone AC-15, Sigma #A5441); rabbit anti-mouse HRP-coupled (WB, 1:10000, Amersham #NIF825); goat anti-rabbit HRP-coupled (WB, 1:10000, Amersham #NIF824); donkey anti-rat HRP-coupled (WB, 1:10000, Jackson Immunoresearch, 712-035-150) and secondary Alexa Fluor 488-, 568-, 647- conjugated antibodies for IF produced in goat were from Invitrogen (1:1000).

## cDNA constructs

wtTDP-43 was cloned into pCMV 5'6His (Clontech) via Sall/NotI. Acetyl-mimic glutamine and acetyl-dead arginine substitutions were introduced by site-directed mutagenesis and cloned into pCMV 5'6His (Sall/NotI). The cloning and mutagenesis primers are listed in supplementary table 3. The mutations were introduced via a 2-step PCR mutagenesis, where TDP-43 gene was amplified in two fragments: from the start of the gene to the mutant codon, and from the mutant codon to the end. These two fragments were used as a template for a third PCR reaction in this case amplifying the whole length of TDP-43 and introducing restriction sites at both ends.

For the EGFP tagged constructs, pEGFP c1 wtTDP-43 was used as a template<sup>46</sup>. K136R and K136Q mutations were introduced via site-directed mutagenesis and cloned into pEGFP c1 via BamHI and HindIII.

For the C-terminally tagged amber suppression constructs, TDP-43 was cloned from the pCMV 5' 6His construct previously mentioned into a pCMV 3'6His vector via Sall and Bsd120I. The amber stop codons from constructs K84TAG and K136TAG TDP-43 were introduced via 2-step point mutagenesis. For the N-terminally tagged amber suppression constructs, TDP-43 was cloned from the amber suppression C-terminally tagged constructs previously mentioned into the vector E400 via NheI and BamHI. The plasmids E400\_pAS1\_4x7SKPyIT\_EF1\_In\_IRES\_Bsd (E400) (<https://benchling.com/s/seq-ZKWKXmPrKBdp8jgpWEt5>) and pPB\_4xPyIT\_EF1\_IPYE\_chAcKRS\_Puro (E451) (<https://benchling.com/s/seq-6fpczrM3tMNE9fZ0P2nk>). Constructs lacking the C-terminal part and with mutated NLS were in addition to K136TAG were cloned from previously described plasmids<sup>6</sup> and cloned into pCMV 3'6His vector via Sall and Bsd120I. Cloning primers are listed in supplementary Table 2.

387

388 Plasmids containing sirtuins were ordered from Addgene, and all of them were produced by Eric Verdin.  
 389 The plasmids ordered were SIRT1 Flag (Addgene plasmid # 13812; RRID:Addgene\_13812), SIRT2 Flag  
 390 (Addgene plasmid # 13813; RRID:Addgene\_13813), SIRT3 Flag (Addgene plasmid # 13814;  
 391 RRID:Addgene\_13814), SIRT4 Flag (Addgene plasmid # 13815; RRID:Addgene\_13815), SIRT5 Flag  
 392 (Addgene plasmid # 13816; RRID:Addgene\_13816), SIRT6 Flag (Addgene plasmid # 13817;  
 393 RRID:Addgene\_13817), and SIRT7 Flag (Addgene plasmid # 13818; RRID:Addgene\_13818). All sirtuin  
 394 plasmids were characterised by North et al.<sup>47</sup>.

395

396 Plasmids containing HDACs 2-5, 7 and 8 were ordered from Addgene. The plasmids ordered were  
 397 HDAC2 Flag (Addgene plasmid # 36829 ; <http://n2t.net/addgene:36829> ; RRID:Addgene\_36829), HDAC3  
 398 Flag (Addgene plasmid # 13819 ; <http://n2t.net/addgene:13819> ; RRID:Addgene\_13819), HDAC4 Flag  
 399 (Addgene plasmid # 13821 ; <http://n2t.net/addgene:13821> ; RRID:Addgene\_13821), HDAC5 Flag  
 400 (Addgene plasmid # 13822 ; <http://n2t.net/addgene:13822> ; RRID:Addgene\_13822), and HDAC7  
 401 (Addgene plasmid # 13824 ; <http://n2t.net/addgene:13824> ; RRID:Addgene\_13824). HDAC2 plasmid was  
 402 characterised by Reyon et al.<sup>48</sup>, HDAC3 plasmid was characterized by Emiliani et al.<sup>49</sup> and HDAC4, 5, 7  
 403 and 8 were characterized by Fischle et al.<sup>50</sup>. HDAC1 and HDAC6 plasmids were generated by Fiesel et  
 404 al.<sup>29</sup>

405

## 406 **Cell culture and transfections**

407 HEK293E were cultured in Dulbecco's Modified Eagle Medium (DMEM) containing 10% Fetal Bovine  
 408 Serum (FBS), at 37° C in 5% CO<sub>2</sub>. Stably TDP-43 Knocked-down cells were generated and characterized  
 409 by previously<sup>25</sup>. Cells were plated at different concentrations corresponding to the surface of the plate for  
 410 different experiments. Transfection of plasmids was done 24 hours after plating using FuGENE6  
 411 (Promega) at a DNA/FuGENE ratio of 1:4.5 according to manufacturer's instructions.

412

## 413 **Amber suppression**

HEK293E cells were plated and cultured in DMEM with 10% FBS and transfected with FuGENE6 (Promega) 24 hours later. 24 or 48 hours after transfection the media was substituted with DMEM with 10%FBS and 5mM Nε-Acetyl-L-lysine (A4021, Sigma). Cells were lysed or fixed after being 24 hours in the presence of acetylated lysine. When mentioned, Ex 527 (CAS 49843-98-3, Santa Cruz Biotechnology) was dissolved in DMSO and added to the cultured cells 24 hours before lysis to a final concentration of 1 or 10μM.

### **Nuclear-cytoplasmic fractionation protocols**

For the nuclear-cytoplasmic fractionation shown in Supplementary Fig. 1b, sh<sup>TDP-43</sup> HEK293E cell pellets from confluent 10cm plates were washed twice in ice-cold PBS and then resuspended in 500μl of hypotonic buffer A (10mM HEPES, 1.5mM MgCl<sub>2</sub>, 10mM KCl, 0.1mM DTT and protein inhibitor cocktail (Roche) and incubated on ice for 5 minutes. Cell membranes were ruptured with 20 strokes in an ice-cold Dounce homogenisator and resulting samples were centrifuged at 500 x g for 5 minutes at 4°C. Supernatants (cytosolic fraction) were mixed with 5x RIPA buffer, incubated for 10 minutes on ice and cleared by spinning the samples at 5000 x g for 15 minutes at 4°C. Pellets containing nuclei and residual cytoplasmic proteins were washed twice with hypotonic buffer A. After resuspension in 500 μl S1 buffer (250mM sucrose and MgCl<sub>2</sub>), samples were layered carefully over 500μl S3 buffer (880mM sucrose and MgCl<sub>2</sub>) and centrifuged at 3000 x g, for 10 minutes at 4°C. The supernatant was discarded, and the remaining pellet was lysed with urea buffer. DNA was sheared by passing lysates 30 times through a 23gauge needle. The cleared supernatants in loading buffer were analysed via Western blotting.

For the nuclear-cytoplasmic fractionations of HEK293E cells shown in Supplementary Fig. 1d, the Subcellular Protein Fractionation Kit for Cultured Cells (Cat. n°: 78840, Thermo Fisher) was used according to manufacturer instructions. Fractions were processed for Western blotting as described above. 10μg of lysate fraction F1 (soluble cytoplasmic) was loaded, and 3μg each were used for fractions F2 (insoluble/membrane-bound), F3 (soluble nuclear) and F4 (chromatin-bound).

### **Cell lysis, solubility fractionation, and Western blotting**

Cells were collected with a cell scraper and lysed in urea lysis buffer (10mM Tris pH 8, 100mM NaH<sub>2</sub>PO<sub>4</sub>, 8M Urea). For the sequential extraction cells were first lysed with RIPA buffer (50mM Tris/HCl pH 8, 150mM NaCl, 1% NP-40, 0.5% deoxycholate, 0.1% SDS, 10mM NaPPi) with proteinase inhibitor cocktail (Roche). Samples were centrifuged at 5000 x *g* for 15 minutes, leaving the RIPA-soluble proteins in the supernatant. The remaining pellet was then lysed in urea buffer, and insoluble material was removed with a centrifugation step at 5000 x *g* for 15 minutes. DNA was sheared with a 23-gauge needle. Protein concentration in lysates in urea buffer was quantified with a Bradford Protein assay kit (Biorad) and lysates in RIPA buffer with BCA protein assay kit (Pierce). 3xLaemmli loading buffer with 100mM DTT was added to the samples and afterwards they were boiled at 95° for 5 minutes. The denatured samples were then subjected to Western blot analysis. Denatured samples were loaded and run in polyacrylamide gels. The gels were then blotted using the wet-transfer Trans-Blot® Cell system from Bio-Rad. Proteins were transferred to Hybond-P polyvinylidene difluoride membranes (Millipore). Membranes were blocked with 5% non-fat milk/TBS-T for an hour at room temperature (RT). Primary antibody incubation took place overnight at 4°C. The membranes were washed and incubated with a HRP-coupled secondary antibody for 1-2 hours at RT. Membranes were washed and proteins were detected with Immobilon Western chemiluminescent HRP substrate (Millipore) using the ChemiDoc XRS+ Imaging System.

### **Generation of monoclonal antibodies against lysine acetylated TDP-43**

Rats were immunized with two ovalbumin-coupled synthetic peptides at the same time: one with amino acids corresponding to residues 79-89 of TDP-43, with K84 acetylated (C-KDNKR(Ac)KMDETD); and the second one corresponding to residues 131-141, with K136 acetylated (C-LMVQV(Ac)KKDLKT). Animals were sacrificed and splenocytes were fused with mouse myeloma cells. Hybridoma supernatants were tested for binding to acetylated and non-acetylated peptides by ELISA. Those supernatants that were positive for the acetylated peptides and negative for the non-acetylated peptides were further validated on lysates of cells expressing either wild-type or amber suppressed TDP-43 by Western blot analysis (dilution 1:10) and immunofluorescence staining (dilution 1:2). Hybridoma clones TDACA 9G9 (IgG2c/k) against [acK84]TDP-43, TDACB 23B3 (IgG1/k) (used only in supplementary Fig. 4) and TDACB 14D4 (IgG2b/k) against [acK136]TDP-43 were stably established by limiting dilution cloning.

## **Immunofluorescence staining**

Cells were plated in 6-well plates and grown for 24 hours. They were then transfected and 6 hours after transfection they were transferred (diluted 1:10) to coverslips in a 24-well plate coated with poly-D-lysine (PDL) and collagen. Cells then grew for 24-72 hours before fixation with 4% PFA/PBS for 20 minutes at RT depending on the experiment. Permeabilization of the cell membrane was done with 1% Triton-X-100/PBS for 5 minutes at RT. Blocking was done with 10% Normal Goat Serum in PBS, for 1 hour at RT. The primary antibody incubations were done at the already mentioned concentrations, in 1%BSA/PBS for 2 hours at RT. The secondary antibody incubation was done in 1% BSA/PBS for 1 hour. Mounting was done using 40µl of Dako mounting media per slide, following a 4° incubation overnight. Immunofluorescence images were acquired using a Zeiss fluorescence microscope with Apotome attachment (Axio imager z1 stand).

## **Fluorescence recovery after photobleaching**

HEK293E cells were plated on glass bottom chambered sides (Lab Tek, 154526) coated with PDL and collagen and transfected with C-terminally EGFP-tagged wt or K136Q TDP-43 after 24 hours. Imaging and photobleaching was done with a Zeiss LSM510 META confocal microscope, using a x63/1.4 oil objective. ROIs were bleached for 1s using a 405nm and a 488 nm laser at maximum power output. Cells were continuously imaged for 3 minutes after bleaching. Reference ROIs were measured from unbleached cells to correct for photobleaching due to fluorescence imaging.

## **Live cell imaging**

HEK293E cells were plated on glass bottom chambered slides coated with PDL. They were transfected with C-terminally EGFP-tagged wt or K136Q TDP-43 after 24 hours. While imaging cells were kept in a temperature controlled chamber at 37° with 5% CO<sub>2</sub>. Imaging was done with an Axio observer Z1.

## **LC-MS/MS**

Mass spectrometry data were obtained from the analysis of the data generated by Hans et al.<sup>17</sup>. In short, 6xHis tagged TDP-43 was purified via nickel beads pulldown and further purified by size in a SDS-PAGE



gel, visualised with Coomassie Brilliant Blue staining. Trypsin (Promega) digestion was performed in-gel. Extracted peptides were analyzed by LC-MS/MS using a nanoflow HPLC system (Ultimate 3000 RSLC; ThermoFisher Scientific) coupled to an Orbitrap Fusion (ThermoFisher Scientific) tandem mass spectrometer. Peptides were separated by reversed C-18 chromatography and 120-min gradients. MS1 spectra were acquired in the Orbitrap at 120,000 resolution. Precursors were selected with the top speed method and 3-s cycle time. HCD-MS2 spectra were acquired with linear ion trap detection. For database search, tandem mass spectra were extracted by MSConvert (ProteoWizard version 3.0.6938). Charge state deconvolution and de-isotoping were not performed. All MS/MS samples were analyzed using Mascot (Matrix Science; version 2.5.1). Mascot was set up to search the SwissProt database (selected for Homo sapiens, 2015\_03, 20203 entries) assuming the digestion enzyme trypsin.

#### **RNA-protein pulldown**

High performance liquid-chromatography-purified RNA oligonucleotides 5'-(UG)<sub>12</sub>-3' and 5'-(UC)<sub>12</sub>-3' were ordered from Sigma. The oligonucleotides were biotinylated using the Pierce RNA 3' End Desthiobiotinylation kit (Cat n° 20163) with small variations. For each 1nmol of biotinylated cytidine bisphosphate 100pmol of RNA were added to the biotinylation reaction. Biotinylated RNA oligos were purified using chloroform:isoamyl. For the RNA-protein pulldown the Pierce Magnetic RNA-Protein Pulldown kit (Cat n° 20164) was used with small variations. Cells were lysed in a NP-40 buffer (50mM NaH<sub>2</sub>PO<sub>4</sub> pH 8.0; 300mM NaCl; 1% NP-40) and 400µg of protein was used for each RNA-protein binding reaction. After 1-hour incubation proteins were eluted in 25µl Laemmli buffer.

#### **Native protein pulldown and filter binding assay**

HEK293E sh<sup>TDP-43</sup> cells were plated in 10cm plates. After 24 hours, cells were transfected with the respective plasmids. After 48 hours, cells were lysed in Native NiNTA lysis buffer (50mM NaH<sub>2</sub>PO<sub>4</sub>, 300mM NaCl, pH 8, 10mM imidazole) and protein concentration was measured via Bradford assay (Bio-Rad). 500-800µg of protein were incubated with NiNTA beads at 4°C overnight. Beads were washed with Native NiNTA lysis buffer with 20mM imidazole. After washing, proteins were eluted in Binding buffer (10mM HEPES, 20mM KCl, 1mM MgCl<sub>2</sub>, 1mM DTT, 5% glycerol) containing 300mM imidazole, which was



then quantified measuring the absorbance at 280nm using a Nanodrop 2000 (Thermo Fisher Scientific). The purified protein was incubated at various concentrations with 2nM of biotinylated poly-(UG)<sub>12</sub> RNA for 30 minutes at room temperature. The resulting complex was run through a Bio-Dot® SF Microfiltration apparatus (Bio Rad, Cat n°: 170-6542) loaded with a nitrocellulose and a positively charged nylon membrane. Membranes were then cross-linked at 120J/m<sup>2</sup> and then labelled RNA was detected using the Chemiluminescent Nucleic Acid Detection module kit (Thermofisher, cat n°: 89880) according to the manufacturer's instructions. In addition, for quantification purposes pulldown fractions were analysed via SDS-PAGE electrophoresis and further Western blot. Band intensity corresponding to wtTDP-43 and K136R TDP-43 was quantified using ImageJ 1.52a and the resulting data was used to normalized the Dot Blot densitometry.

#### **Nickel pulldown of 6xHis-tagged TDP-43**

Cells were plated in 10cm plates for 24 hours before transfection. 72 hours after transfection cells were lysed in urea lysis buffer containing 10mM imidazole. DNA was sheared with a 23-gauge needle. After quantifying the amount of protein in the lysates with a Bradford Protein assay kit (Biorad), 500-800µg of protein were incubated with Ni-NTA agarose beads (Qiagen) at 4° C overnight. Beads were washed with Urea wash buffer (10mM Tris pH 6.3, 100mM NaH<sub>2</sub>PO<sub>4</sub>, 8M Urea) containing 20mM imidazole. Afterwards proteins were eluted in 3x Laemmli buffer at 95° for 10 minutes. Eluted proteins were analysed in Western blot.

#### **RNA extraction and RT-PCR**

sh<sup>TDP-43</sup> TDP-43 HEK293E cells were plated in 6-well plates and after 24 hours were double-transfected with the corresponding TDP-43 construct and a CFTR minigene construct<sup>12</sup> in a proportion of 2:1. After 72 hours RNA was isolated using the RNeasy Mini Kit (Qiagen) following the indications from the provider. From the isolated RNA cDNA was obtained using the Transcriptor High Fidelity cDNA Synthesis Kit (Sigma) following the protocol of the provider. The cDNA of interest was then amplified via a standard PCR and the product was run in a 2% agarose gel. DNA was visualised using Midori Green from Biozym and the ChemiDoc XRS+ Imaging System.

## Statistical analyses and molecular representations

Cellprofiler 4.1.3 was used for quantification of immunofluorescence pictures. Statistical significance was calculated using Microsoft Excel 2016. Densitometry of electrophoresis gels was performed using ImageJ 1.52a (NIH). P values below 0.01 were considered significant. Unpaired t-tests were performed to compare two variables and assess significance. Chi-squared test was used to assess significance in the immunofluorescence experiments. n values detailed in each figure legend. Graphical representations of TDP-43 mutants and acetylated forms was made with Pymol (version 2.4.0). Post translational modifications were modulated using the PyTMs plugin by Warnecke et al.<sup>51</sup>

## Acknowledgements

We would like to thank Dr. Ivana Nikić-Spiegel and Dirk Schwarzer for helpful discussions, Dr. Petra Frick for the validation of the acetyl-TDP-43 antibodies, Dr. Sven Geisler for excellent technical advice, Stefan Hauser for help with Live Cell Imaging, and Anna Lechado Terradas for critical comments on the manuscript. This work was supported by the NOMIS Foundation; German Research Foundation (DFG) grant KA1675/3-2; the German Center for Neurodegenerative Diseases (DZNE) within the Helmholtz Association; and the Hertie Foundation.

## Author contributions

JGM designed and performed most experiments and analyzed the results. FH assisted the study and provided TDP-43 reagents. FvZ and CJG performed MS and analyzed the data. RF generated the antibodies against acetylated TDP-43. SE provided the amber suppression methodology and reagents. AS established the FRAP assay. EB provided the *CFTR* reporter minigene and methodological support for splicing and RNA binding assays. MN contributed to the study design and provided neuropathological tools. MN and PJK acquired funding. PJK conceptualized and supervised the study. JGM and PJK wrote the draft and all co-authors edited the paper.

## Conflict of interest

The authors declare that they have no conflict of interest with the contents of this article.

## References

- <sup>1</sup> Buratti, E. & Baralle, F.E. The multiple roles of TDP-43 in pre-mRNA processing and gene expression regulation (Taylor and Francis Inc., 2010), Vol. 7, pp. 420-429.
- <sup>2</sup> Sephton, C.F., Cenik, B., Cenik, B.K., Herz, J., & Yu, G., TDP-43 in central nervous system development and function: clues to TDP-43-associated neurodegeneration. *Biol Chem* 393 (7), 589-594 (2012).
- <sup>3</sup> Ratti, A. & Buratti, E., Physiological functions and pathobiology of TDP-43 and FUS/TLS proteins. *J Neurochem* 138 Suppl 1 (S1), 95-111 (2016).
- <sup>4</sup> Neumann, M. *et al.*, Ubiquitinated TDP-43 in frontotemporal lobar degeneration and amyotrophic lateral sclerosis. *Science* 314 (5796), 130-133 (2006).
- <sup>5</sup> Arai, T. *et al.*, TDP-43 is a component of ubiquitin-positive tau-negative inclusions in frontotemporal lobar degeneration and amyotrophic lateral sclerosis. *Biochemical and Biophysical Research Communications* 351 (3), 602-611 (2006).
- <sup>6</sup> Winton, M.J. *et al.*, Disturbance of nuclear and cytoplasmic TAR DNA-binding protein (TDP-43) induces disease-like redistribution, sequestration, and aggregate formation. *J Biol Chem* 283 (19), 13302-13309 (2008).
- <sup>7</sup> Pinarbasi, E.S. *et al.*, Active nuclear import and passive nuclear export are the primary determinants of TDP-43 localization. *Sci Rep* 8 (1), 7083 (2018).
- <sup>8</sup> Ayala, Y.M. *et al.*, Structural determinants of the cellular localization and shuttling of TDP-43. *J Cell Sci* 121 (Pt 22), 3778-3785 (2008).
- <sup>9</sup> Tollervey, J.R. *et al.*, Characterizing the RNA targets and position-dependent splicing regulation by TDP-43. *Nat Neurosci* 14 (4), 452-458 (2011).
- <sup>10</sup> Buratti, E. & Baralle, F.E., Characterization and functional implications of the RNA binding properties of nuclear factor TDP-43, a novel splicing regulator of CFTR exon 9. *J Biol Chem* 276 (39), 36337-36343 (2001).
- <sup>11</sup> Buratti, E. *et al.*, Nuclear factor TDP-43 and SR proteins promote in vitro and in vivo CFTR exon 9 skipping. *EMBO J* 20 (7), 1774-1784 (2001).
- <sup>12</sup> Prasad, A., Sivalingam, V., Bharathi, V., Girdhar, A., & Patel, B.K., The amyloidogenicity of a C-terminal region of TDP-43 implicated in Amyotrophic Lateral Sclerosis can be affected by anions, acetylation and homodimerization. *Biochimie* 150, 76-87 (2018).
- <sup>13</sup> Gao, F.B., Almeida, S., & Lopez-Gonzalez, R., Dysregulated molecular pathways in amyotrophic lateral sclerosis-frontotemporal dementia spectrum disorder. *EMBO J* 36 (20), 2931-2950 (2017).
- <sup>14</sup> Hasegawa, M. *et al.*, Phosphorylated TDP-43 in frontotemporal lobar degeneration and amyotrophic lateral sclerosis. *Ann Neurol* 64 (1), 60-70 (2008).
- <sup>15</sup> Neumann, M. *et al.*, Phosphorylation of S409/410 of TDP-43 is a consistent feature in all sporadic and familial forms of TDP-43 proteinopathies. *Acta Neuropathol* 117 (2), 137-149 (2009).

- 16 Hans, F., Eckert, M., von Zweydford, F., Gloeckner, C.J., & Kahle, P.J., Identification and characterization of ubiquitinylation sites in TAR DNA-binding protein of 43 kDa (TDP-43). *J Biol Chem* 293 (41), 16083-16099 (2018).
- 17 Maurel, C. *et al.*, A role for SUMOylation in the Formation and Cellular Localization of TDP-43 Aggregates in Amyotrophic Lateral Sclerosis. *Mol Neurobiol* 57 (3), 1361-1373 (2020).
- 18 Cohen, T.J. *et al.*, An acetylation switch controls TDP-43 function and aggregation propensity. *Nat Commun* 6, 5845 (2015).
- 19 Wang, P., Wander, C.M., Yuan, C.X., Bereman, M.S., & Cohen, T.J., Acetylation-induced TDP-43 pathology is suppressed by an HSF1-dependent chaperone program. *Nat Commun* 8 (1), 82 (2017).
- 20 Maharana, S. *et al.*, RNA buffers the phase separation behavior of prion-like RNA binding proteins. *Science* 360 (6391), 918-921 (2018).
- 21 Mann, J.R. *et al.*, RNA Binding Antagonizes Neurotoxic Phase Transitions of TDP-43. *Neuron* 102 (2), 321-338 e328 (2019).
- 22 Wang, J. *et al.*, A Molecular Grammar Governing the Driving Forces for Phase Separation of Prion-like RNA Binding Proteins. *Cell* 174 (3), 688-699 e616 (2018).
- 23 Bentmann, E. *et al.*, Requirements for stress granule recruitment of fused in sarcoma (FUS) and TAR DNA-binding protein of 43 kDa (TDP-43). *J Biol Chem* 287 (27), 23079-23094 (2012).
- 24 Zhang, Y.J. *et al.*, The dual functions of the extreme N-terminus of TDP-43 in regulating its biological activity and inclusion formation. *Hum Mol Genet* 22 (15), 3112-3122 (2013).
- 25 Voigt, A. *et al.*, TDP-43-mediated neuron loss in vivo requires RNA-binding activity. *PLoS One* 5 (8), e12247 (2010).
- 26 Lukavsky, P.J. *et al.*, Molecular basis of UG-rich RNA recognition by the human splicing factor TDP-43. *Nat Struct Mol Biol* 20 (12), 1443-1449 (2013).
- 27 Chiang, C.H. *et al.*, Structural analysis of disease-related TDP-43 D169G mutation: linking enhanced stability and caspase cleavage efficiency to protein accumulation. *Sci Rep* 6, 21581 (2016).
- 28 Neumann, M., Molecular neuropathology of TDP-43 proteinopathies. *Int J Mol Sci* 10 (1), 232-246 (2009).
- 29 Fiesel, F.C. *et al.*, Knockdown of transactive response DNA-binding protein (TDP-43) downregulates histone deacetylase 6. *EMBO J* 29 (1), 209-221 (2010).
- 30 Bryson, D.I. *et al.*, Continuous directed evolution of aminoacyl-tRNA synthetases. *Nat Chem Biol* 13 (12), 1253-1260 (2017).
- 31 Kawakami, I., Arai, T., & Hasegawa, M., The basis of clinicopathological heterogeneity in TDP-43 proteinopathy. *Acta Neuropathologica* 138 (5), 751-770 (2019).
- 32 Conicella, A.E., Zerbe, G.H., Mittal, J., & Fawzi, N.L., ALS Mutations Disrupt Phase Separation Mediated by  $\alpha$ -Helical Structure in the TDP-43 Low-Complexity C-Terminal Domain. *Structure* 24 (9), 1537-1549 (2016).
- 33 Seto, E. & Yoshida, M., Erasers of histone acetylation: the histone deacetylase enzymes. *Cold Spring Harb Perspect Biol* 6 (4), a018713 (2014).
- 34 Tang, B.L. Could Sirtuin Activities Modify ALS Onset and Progression? (Springer New York LLC, 2017), Vol. 37, pp. 1147-1160.
- 35 Yu, Z. *et al.*, Neurodegeneration-associated TDP-43 interacts with fragile X mental retardation protein (FMRP)/Staufen (STAU1) and regulates SIRT1 expression in neuronal cells. *J Biol Chem* 287 (27), 22560-22572 (2012).
- 36 Renton, A.E., Chio, A., & Traynor, B.J., State of play in amyotrophic lateral sclerosis genetics. *Nat Neurosci* 17 (1), 17-23 (2014).
- 37 Baizabal-Carvallo, J.F. & Jankovic, J. Parkinsonism, movement disorders and genetics in frontotemporal dementia (Nature Publishing Group, 2016), Vol. 12, pp. 175-185.

- Gal, J. *et al.*, The Acetylation of Lysine-376 of G3BP1 Regulates RNA Binding and Stress Granule Dynamics. *Mol Cell Biol* 39 (22) (2019).
- Zhang, W., Sun, Y., Liu, W., Dong, J., & Chen, J., SIRT1 mediates the role of RNA-binding protein QKI 5 in the synthesis of triglycerides in non-alcoholic fatty liver disease mice via the PPARalpha/FoxO1 signaling pathway. *Int J Mol Med* 43 (3), 1271-1280 (2019).
- Yu, H. *et al.*, HSP70 chaperones RNA-free TDP-43 into anisotropic intranuclear liquid spherical shells. *Science* 371 (6529) (2021).
- Geser, F., Lee, V.M., & Trojanowski, J.Q., Amyotrophic lateral sclerosis and frontotemporal lobar degeneration: a spectrum of TDP-43 proteinopathies. *Neuropathology* 30 (2), 103-112 (2010).
- Choudhary, C. *et al.*, Lysine acetylation targets protein complexes and co-regulates major cellular functions. *Science* 325 (5942), 834-840 (2009).
- Gomes, E. & Shorter, J. The molecular language of membraneless organelles (American Society for Biochemistry and Molecular Biology Inc., 2019), Vol. 294, pp. 7115-7127.
- Elsasser, S.J., Ernst, R.J., Walker, O.S., & Chin, J.W., Genetic code expansion in stable cell lines enables encoded chromatin modification. *Nat Methods* 13 (2), 158-164 (2016).
- Kametani, F. *et al.*, Mass spectrometric analysis of accumulated TDP-43 in amyotrophic lateral sclerosis brains. *Sci Rep* 6 (1), 23281 (2016).
- Hans, F. *et al.*, UBE2E ubiquitin-conjugating enzymes and ubiquitin isopeptidase Y regulate TDP-43 protein ubiquitination. *J Biol Chem* 289 (27), 19164-19179 (2014).
- North, B.J., Marshall, B.L., Borra, M.T., Denu, J.M., & Verdin, E., The Human Sir2 Ortholog, SIRT2, Is an NAD<sup>+</sup>-Dependent Tubulin Deacetylase. *Molecular Cell* 11 (2), 437-444 (2003).
- Reyon, D. *et al.*, FLASH assembly of TALENs for high-throughput genome editing. (1546-1696 (Electronic)).
- Emiliani, S., Fischle, W., Van Lint, C., Al-Abed, Y., & Verdin, E., Characterization of a human RPD3 ortholog, HDAC3. *Proceedings of the National Academy of Sciences* 95, 2795-2800 (1998).
- Fischle, W. *et al.*, A New Family of Human Histone Deacetylases Related to *Saccharomyces cerevisiae* HDA1p. *Journal of Biological Chemistry* 274 (17), 11713-11720 (1999).
- Warnecke, A., Sandalova, T., Achour, A., & Harris, R.A., PyTMs: a useful PyMOL plugin for modeling common post-translational modifications. *BMC Bioinformatics* 15 (1), 370 (2014).

## Figure legends

**Figure 1. TDP-43 is acetylated and its acetylation at K84 may affect its nuclear-cytoplasmic trafficking while acetylation at K136 causes a nuclear droplet-like distribution.**

**a)** HEK293E cells were transfected with 6xHis tagged TDP-43, which was purified with Ni-NTA beads and subjected to MS. The residues marked in the domain structure of TDP-43 were found to be acetylated (black arrows). K145 has been reported to be acetylated in the literature but we could not find it in our study (grey arrow). **b)** Immunostaining of HEK293E cells transfected with 6xHis tagged wtTDP-43, acetyl-

dead (K84R, K136R and K145R) or acetyl-mimics (K84Q, K136Q and K145Q). Scale bar represents 10  $\mu$ m. N =3. **c)** Quantification of percentage of cells with 6xHis-TDP-43 protein distribution diffuse nuclear (blue bars), nuclear clumpy (gray bars), nuclear + cytosolic, diffuse (orange bars) and nuclear + cytosolic, clumpy (yellow bars). 300 transfected cells per group were classified. \*\*\* =  $p < 0.001$  as measured by Chi squared test.

## **Figure 2. K136 mutations reduce the solubility of TDP-43 and trigger its ubiquitination and pathological phosphorylation.**

**a)** Sh<sup>TDP-43</sup>-HEK293E cells were transfected with 6xHis tagged TDP-43 (wt, K136R and K136Q) or Flag-tagged FFL TDP-43. RIPA soluble and insoluble fractions were separated and analyzed by Western blotting. N =3. **b)** Sh<sup>TDP-43</sup>-HEK293E cells were transfected with 6xHis tagged TDP-43 (wt, K136R and K136Q). Proteasome activity was inhibited by treatment with 20 $\mu$ M MG-132 for 6h, which caused wtTDP-43 ubiquitination (lane 3). 6xHis tagged TDP-43 was purified with Ni-NTA beads and analyzed on Western blots. N =3. **c)** Transfected sh<sup>TDP-43</sup>-HEK293E cells were double immunostained for TDP-43 and phosphorylated TDP-43 (S409/410). Scale bar represents 10 $\mu$ m.

## **Figure 3. K136 mutations alter the RNA binding and splicing capabilities of TDP-43.**

**a)** Sh<sup>TDP-43</sup>-HEK293E cells were transfected with an empty plasmid, wt or K136Q TDP-43. The lysates were then incubated with biotinylated (UC)<sub>12</sub> or (UG)<sub>12</sub> RNA oligomers. Protein-RNA mix was incubated with magnetic streptavidin beads. Bound proteins were eluted and analyzed by Western blotting. **b)** Increasing concentrations of 6xHis purified protein was incubated with biotinylated (UG)<sub>12</sub> oligomers. The resulting complexes were analyzed by a filter binding assay. Membranes were incubated with HRP-coupled streptavidin. One of the [K136Q]TDP-43 data points illustrates overload problems at high protein concentration (>875nM), precluding firm establishment of saturation binding curves. **c)** Quantification of 3 replicates of filter-binding assay of wt and K136Q TDP-43 to biotinylated (UG)<sub>12</sub> RNA oligomers. \*\* =  $p < 0.01$ . **d)** Western blot of the protein levels before and after the purification of native TDP-43 via Ni-NTA



pull-down. **e)** Sh<sup>TDP-43</sup>-HEK293E cells were cotransfected with the specified TDP-43 constructs and a plasmid containing the *CFTR* minigene. RNA was extracted and splicing of *CFTR* exon 9 was assessed via rtPCR (upper panel). Protein levels are shown in the lower panel. N = 3. **f)** Quantification of 3 replicates looking at the effect of mutations at different lysines of TDP-43 on the splicing of *CFTR* exon 9. \*\* = p < 0.01.

**Figure 4. Amber suppression-mediated acetylation at K136 of TDP-43 prevents *CFTR* splicing, triggers the formation of nuclear droplets via its C-terminal domain. Acetylation at K84 reduces nuclear import.**

**a)** HEK293E cells cotransfected with a plasmid containing acKRS and 4xRNA<sub>TAG</sub> (E451) and with TDP-43 with an amber stop codon at different positions and a C-terminal 6xHis tag. Media was changed to 5mM acK-containing media 24 hours before lysis. Protein lysates were analysed via Western blot. **b)** Cells were cotransfected with the E451 plasmid and different C-terminally 6xHis tagged TDP-43 constructs containing amber suppression codons. Cells were fixed after 24h in the presence of 5mM acK. Scale bar represents 10µm. **c)** Sh<sup>TDP-43</sup>-HEK293E cells cotransfected with E451, *CFTR* minigene, and an empty plasmid, wt or K136<sub>TAG</sub> TDP-43. After 24 hours in the presence of 5mM acK, RNA was extracted and the splicing of *CFTR* exon 9 was assessed via rtPCR and visualised in an agarose gel. **d)** Sh<sup>TDP-43</sup>-HEK293E cells were cotransfected with E451 plasmid and different C-terminally tagged TDP-43 constructs. Lanes 3-5 have an amber stop codon at position 136 in addition to a mutated NLS, an amber stop codon at position 84 or a deletion of the C-terminus. Cells were treated with 5mM acK for 24h before lysis. **e)** Sh<sup>TDP-43</sup>-HEK293E cells were cotransfected with E451 and different C-terminally tagged TDP-43 constructs. Cells were fixed and immunolabeled after 24h in the presence of 5mM acK. Scale bar represents 10µm. **f)** Classification of 250 cells per group cotransfected with E451 plasmid and different 6xHis C-terminally tagged TDP-43 constructs. The classification was made as in Fig. 1c.

**Figure 5. [K136Q]TDP-43 droplets have reduced mobility, growing in size and fusing over time.**

**a)** Representative images of FRAP analysis of HEK293 cells transfected with C-terminally EGFP-tagged wt and K136Q TDP-43. Two different groups of [K136Q]TDP-43-EGFP droplets based on size were determined. Time in seconds. Scale Bar represents 5µm. **b)** Quantification of FRAP images. 3 cells quantified per group. **c)** Quantification of mobile fraction of FRAP analysis of wt and K136Q TDP-43 mutants. 3 cells quantified per group. \* =  $p < 0.05$ . **d)** Selected frames from green fluorescence live cell imaging of cells expressing [K136Q]TDP-43-EGFP. Close-up of granules fusing (white arrows). Time in seconds. Scale bar represents 5µm **e)** Histogram of K136Q TDP-43 aggregate size in HEK293E fixed 24, 48 or 72 hours after transfection. 100 transfected cells analyzed for each time point. \*\* =  $p < 0.01$ .

# **Figure 6. Antibodies against acetylated TDP-43 specifically recognize the modified forms.**

**a-b)** Sh<sup>TDP-43</sup>-HEK293E cells were co transfected with E451 plasmid and different C-terminally 6xHis tagged TDP-43 constructs. After 24h in the presence of 5mM of acK cells were lysed. Samples were Western probed with antibodies against acetylated K84 (clone 9G9) and K136 (clone 14D4), respectively. **c-d)** Sh<sup>TDP-43</sup>-HEK293E cells were co transfected with E451 plasmid and different C-terminally 6xHis tagged TDP-43 constructs. After 24h in the presence of 5mM of acK cells were fixed and immunostained for 6xHis or acetylated TDP-43. Scale bar represents 10µm.

# **Figure 7. Sirtuins 1 and 2 can deacetylate K136 of TDP-43 and prevent its aggregation.**

**a)** Sh<sup>TDP-43</sup>-HEK293E cells were cotransfected with E451, K136<sub>TAG</sub> TDP-43 and SIRT1 or SIRT2. 24h before lysis, 5mM AcK and DMSO, 1µM or 10µM Ex527 containing media was supplied to the cells. **b)** Stably amber suppressed sh<sup>TDP-43</sup>-HEK293E cells were cotransfected with different sirtuin constructs together with K136<sub>TAG</sub> TDP-43. Cells were fixed after 24h in the presence of 5mM acK. **c)** Quantification of the number of cells with TDP-43 positive inclusions. 200 cells recorded per condition.

**Supplementary Table 1.** TDP-43 peptides found by MS to be acetylated. Longer chain lysine modifications like propionylation and butyrylation were not detected.



**Supplementary Table 2.** List of mutagenesis and cloning primers.

**Supplementary Figure 1. a)** Immunostaining of HEK293E cells previously transfected with 6xHis tagged non acetyl-mimics (K79R and K121R) or acetyl-mimics (K79Q and K121Q). Scale bar represents 10  $\mu$ m. N =3. **b)** Cytoplasmic and nuclear fractions from HEK293E cells transfected with 6xHis tagged wt, K84R, K84Q or Flag tagged  $\Delta$ NLS TDP-43. These fractions were analyzed by Western blot. 6 and 3,5 $\mu$ g of protein from the cytoplasmic and nuclear fraction was loaded, respectively. N =2. Hsp90 and YY1 were used as cytoplasmic and nuclear markers respectively. **c)** Quantification of the proportion of TDP-43 in the cytoplasm normalized to wtTDP-43. N = 2. \* =  $p < 0.05$ , \*\* =  $p < 0.01$ . **d)** Subcellular protein fractionation of different TDP-43 constructs. Cells were transfected with 6xHis tagged TDP-43 and proteins were fractionated in four fractions using a subcellular protein fractionation kit for cultured cells (Thermo Fisher) according to manufacturer's instructions: F1 (cytoplasmic soluble), F2 (membrane bound), F3 (nuclear soluble) and F4 (histone bound). Hsp90, YY1 and H3 were used as markers for the cytoplasmic, nuclear soluble and histone bound fractions, respectively. N = 2.

**Supplementary Figure 2. a)** Structure of TDP-43 RRM1 in contact with RNA (PDB: 4BS2) with highlighted K136 atoms. **b)** Close up view of TDP-43 with different 136 amino acid substitutions. Green circles represent points of contact between TDP-43 amino acids. Red circles represent clashes between residue 136 and other objects.

**Supplementary Figure 3. Amber suppression of TDP-43 at K79 and K121 does not impact its subcellular distribution.**

**a)** Western blot of HEK293E cells transfected with E451 containing a Flag-tagged acKRS, RNA<sub>TAG</sub> and different C-terminal 6xHis-tagged TDP-43 constructs. Cells were lysed after 24h in the presence of 5mM

acK in the media. **b)** Double immunostaining of HEK293E cells transfected with Flag-tagged acKRS, RNA<sub>TAG</sub> and different C-terminal 6xHis-tagged TDP-43 constructs. Cells were fixed after 24h in the presence of 5mM acK in the media. Scale bar represents 10µm.

**Supplementary Figure 4. HDAC and Sirtuin effect on K136 acetylation of TDP-43.**

**a)** Stably amber suppressed sh<sup>TDP-43</sup>-HEK293E cells were cotransfected with HDAC1-8 constructs together with K136<sub>TAG</sub> TDP-43. Cells were lysed after 24h in the presence of 5mM acK. Protein levels were assessed via Western blot. HDAC1 and 6 were myc-tagged, while HDAC2, 3, 4, 5, 7 and 8 were Flag tagged. N = 2. **b)** Stably amber suppressed sh<sup>TDP-43</sup>-HEK293E cells were cotransfected with HDAC1 or HDAC6 constructs together with K136<sub>TAG</sub> TDP-43 or wtTDP-43. Cells were lysed after 24h in the presence of 5mM acK. Protein levels were assessed via Western blot. N = 2 **c)** Stably amber suppressed sh<sup>TDP-43</sup>-HEK293E cells were cotransfected with sirtuin constructs together with K136<sub>TAG</sub> TDP-43. Cells were lysed after 24h in the presence of 5mM acK. Protein levels were assessed via Western blot. N =3.

**Supplementary video 1 and 2.** Live imaging of HEK293E cells 48h after transfection with [K136Q]TDP-43-EGFP. Cells were kept at 37°C and 5% CO<sub>2</sub> during the experiment. Imaging took place every 5min for 4h.

**Supplementary video 3.** Live imaging of HEK293E cells 48h after transfection with [K136Q]TDP-43-EGFP. Cells were kept at 37°C and 5% CO<sub>2</sub> during the experiment. Imaging took place every 2min for 1h.

# Figure 1

a

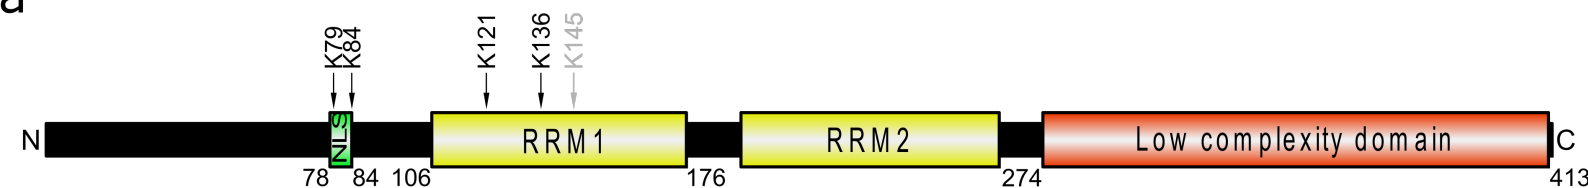

b

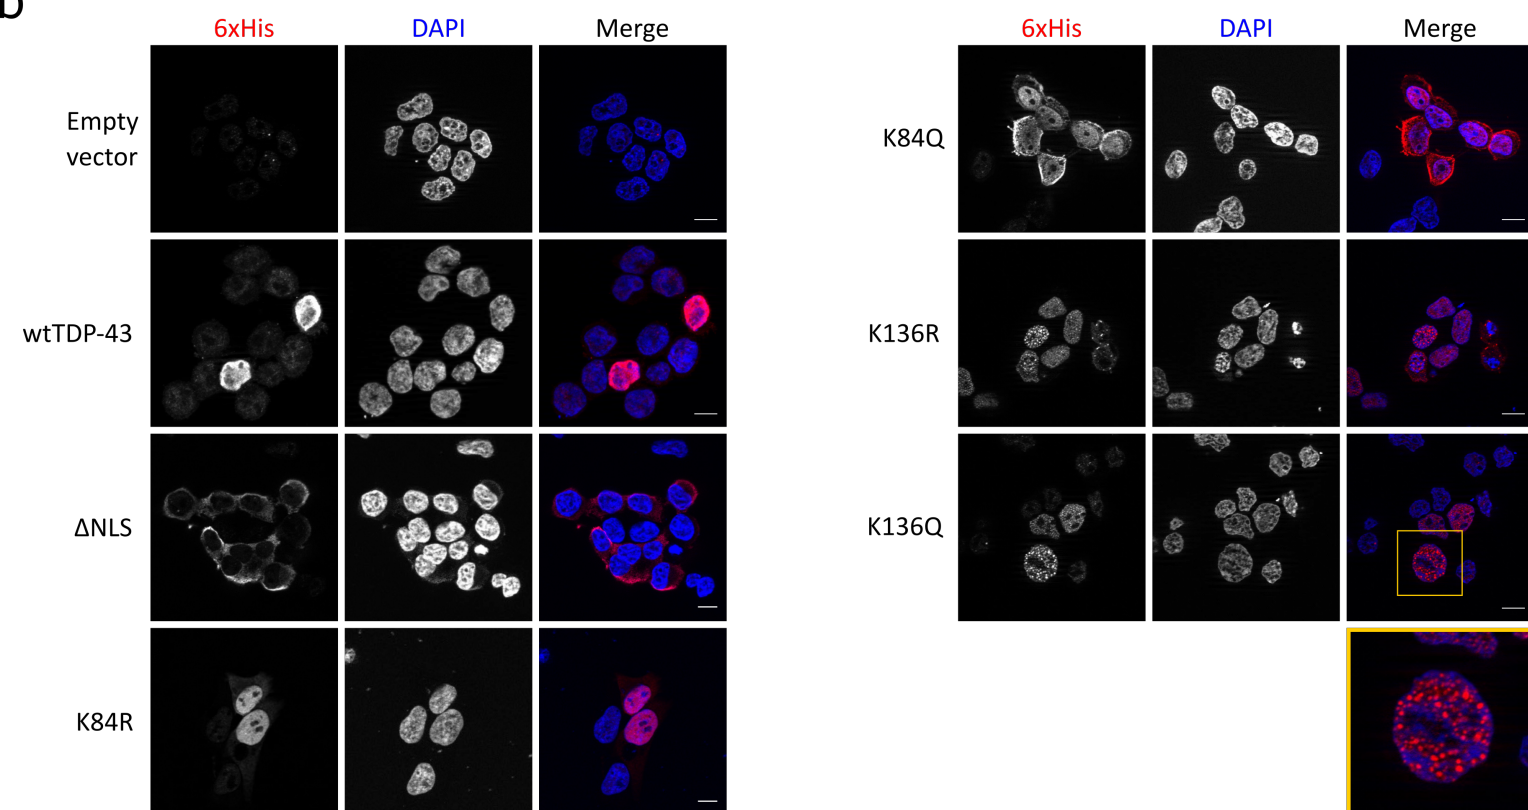

c

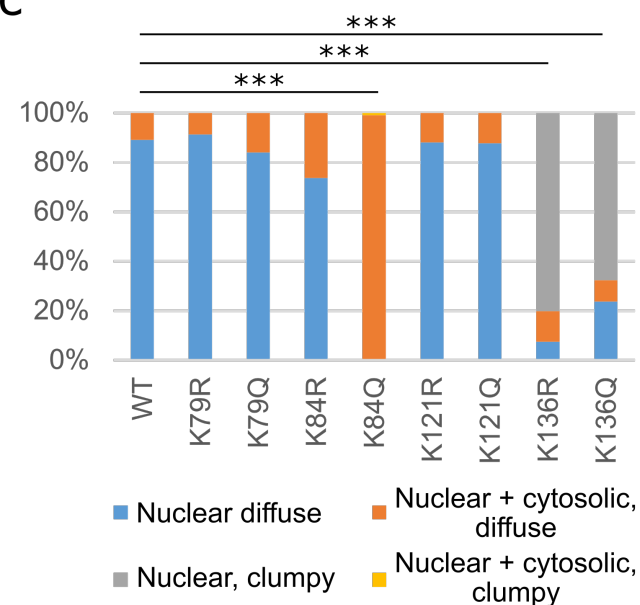

**Figure 2**  
bioRxiv preprint doi: <https://doi.org/10.1101/2020.05.26.104356>; this version posted October 30, 2021. The copyright holder for this preprint (which was not certified by peer review) is the author/funder, who has granted bioRxiv a license to display the preprint in perpetuity. It is made available under aCC-BY-NC-ND 4.0 International license.

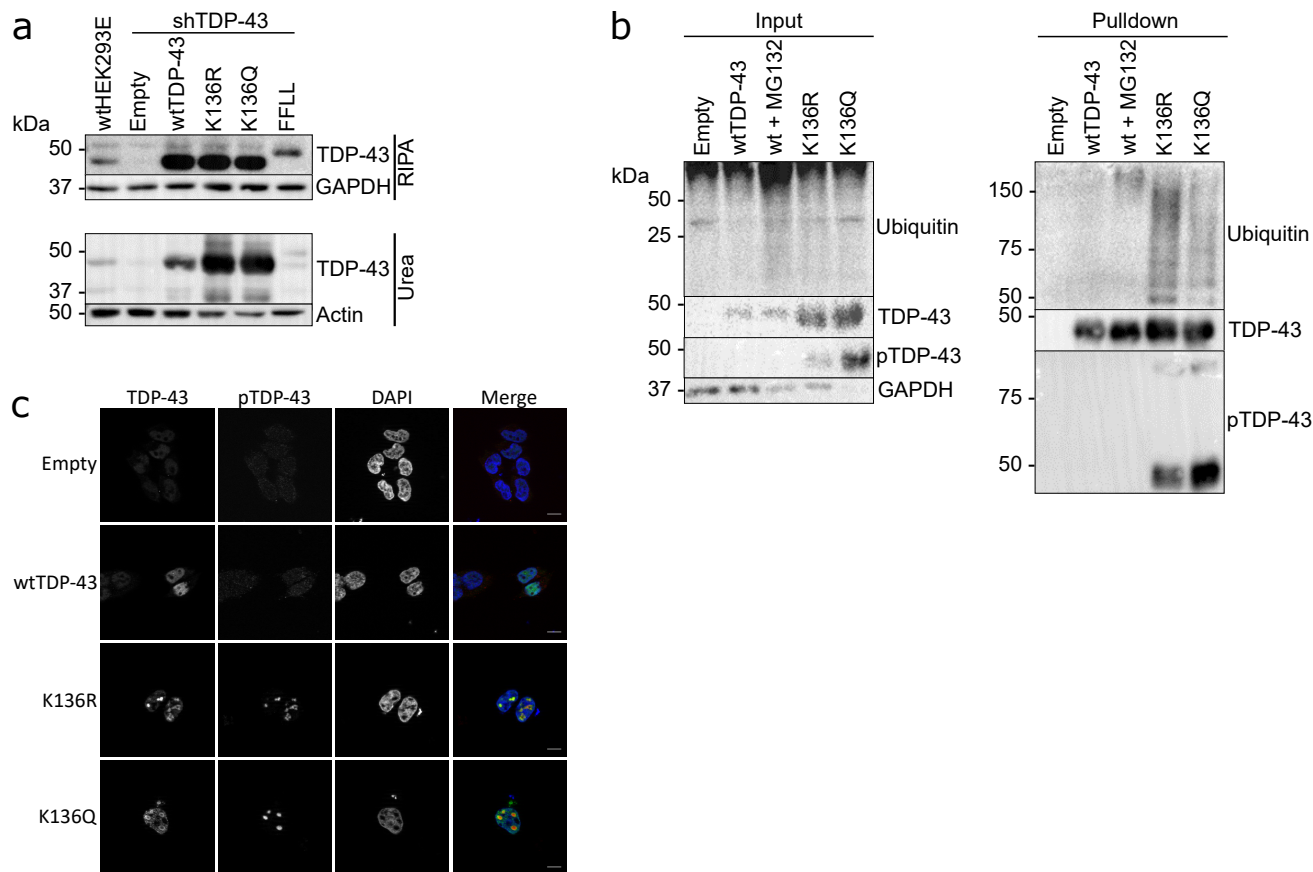

## Figure 3

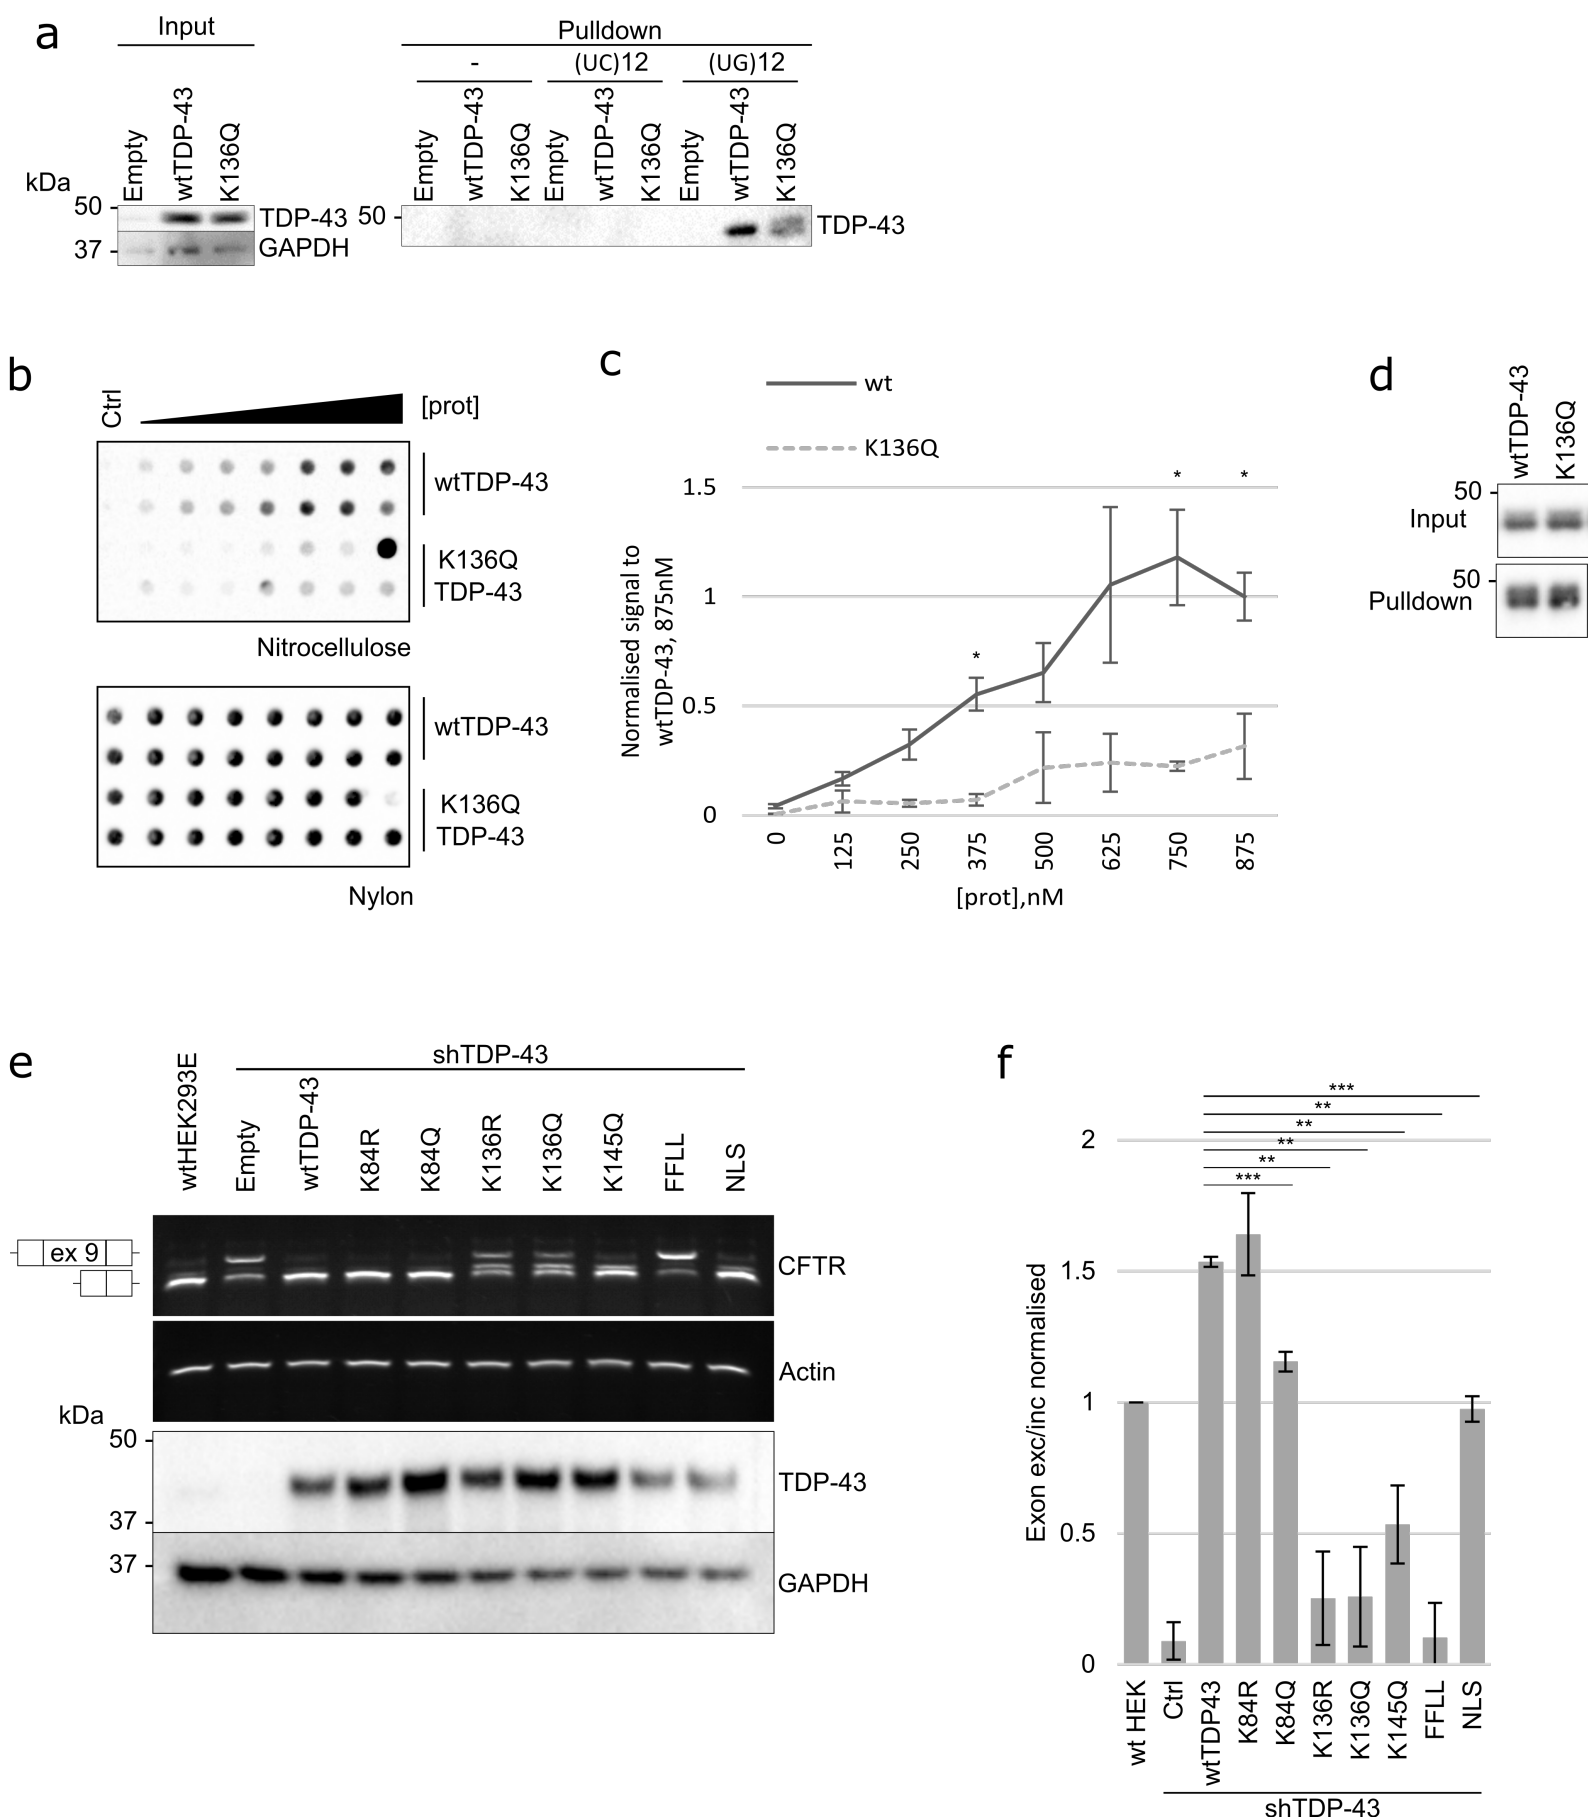

## Figure 4

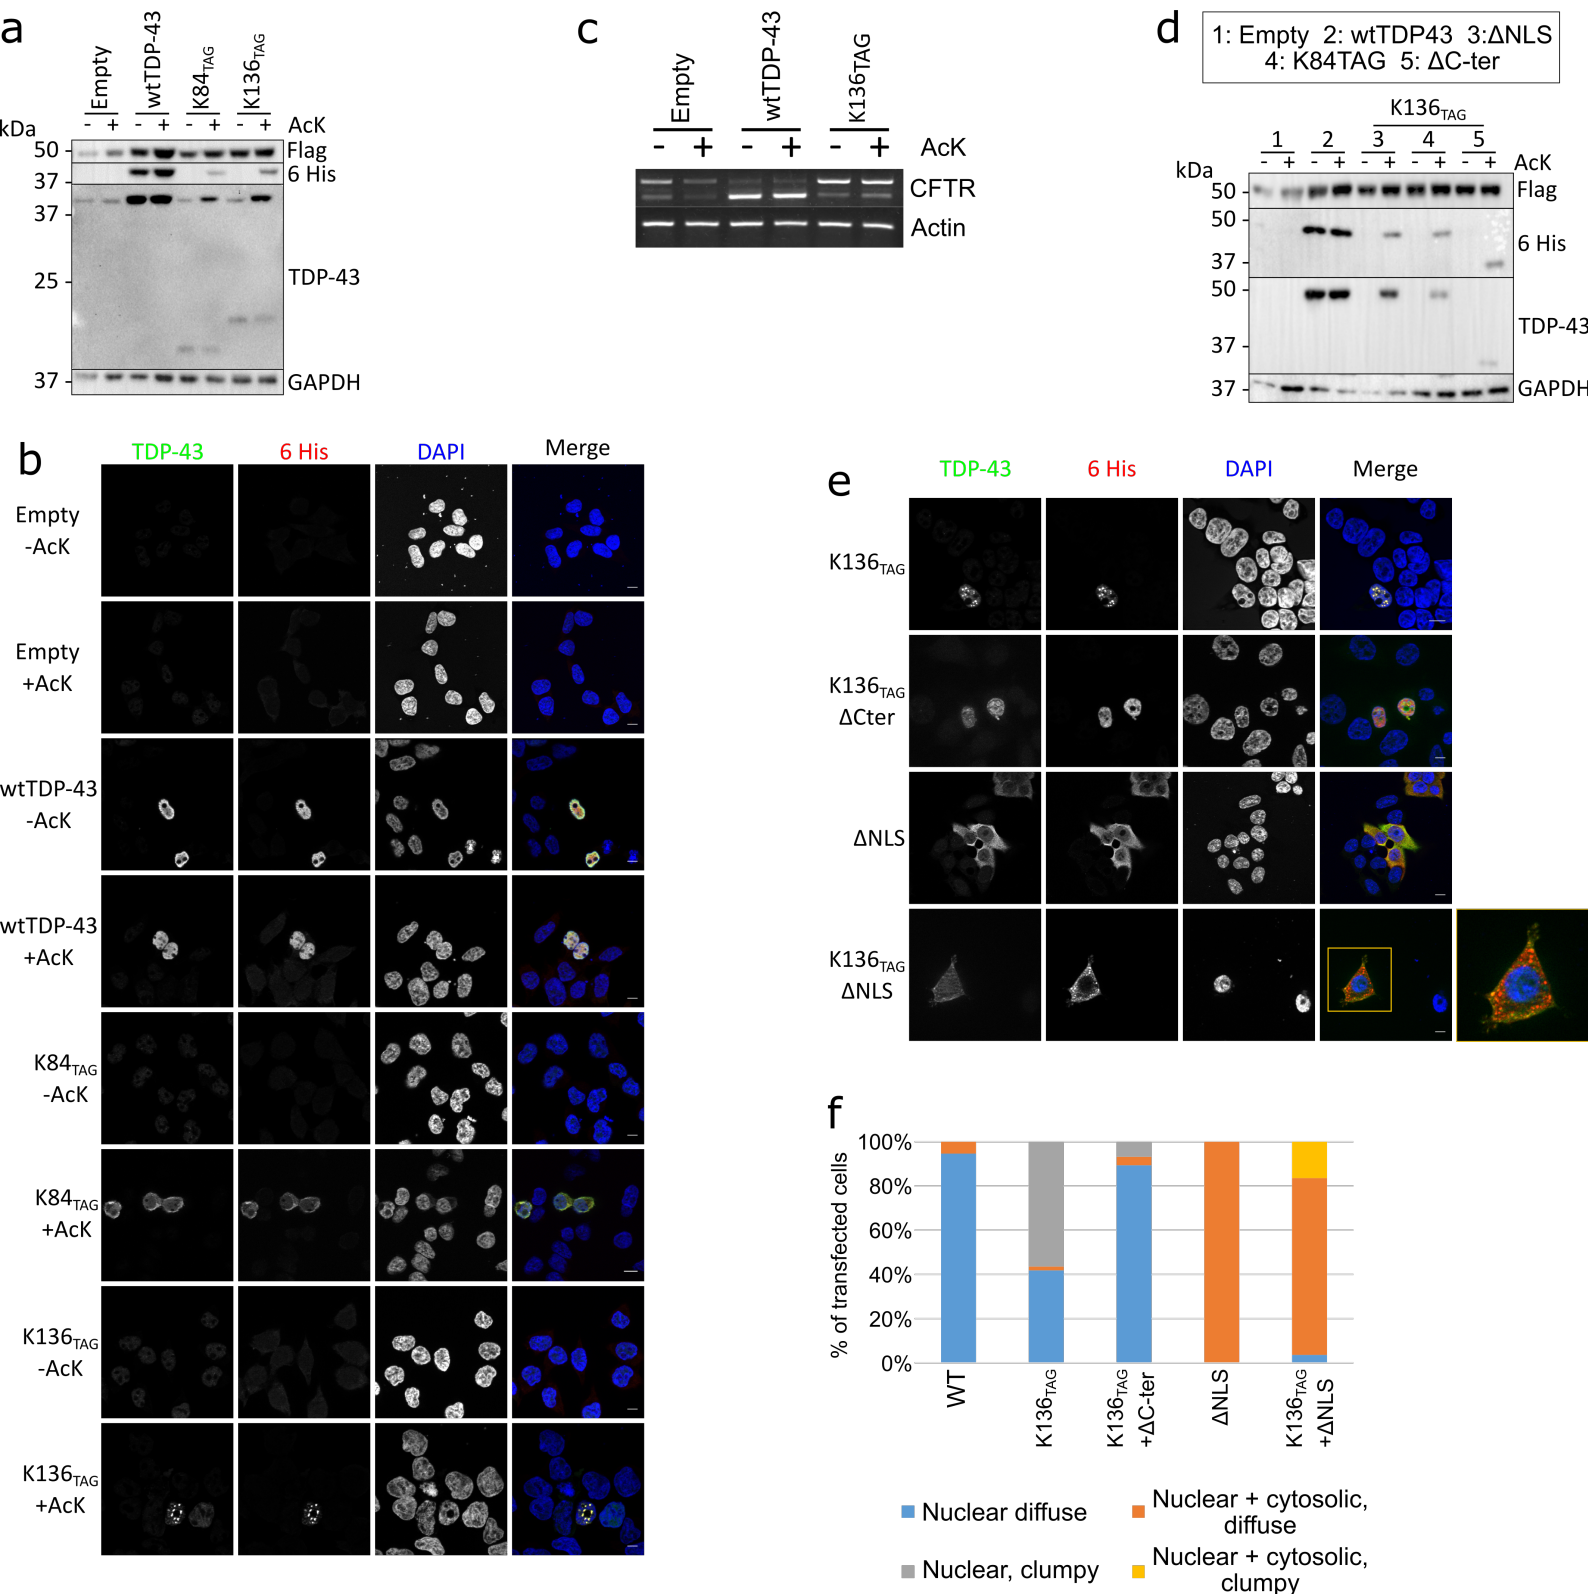

Figure 5

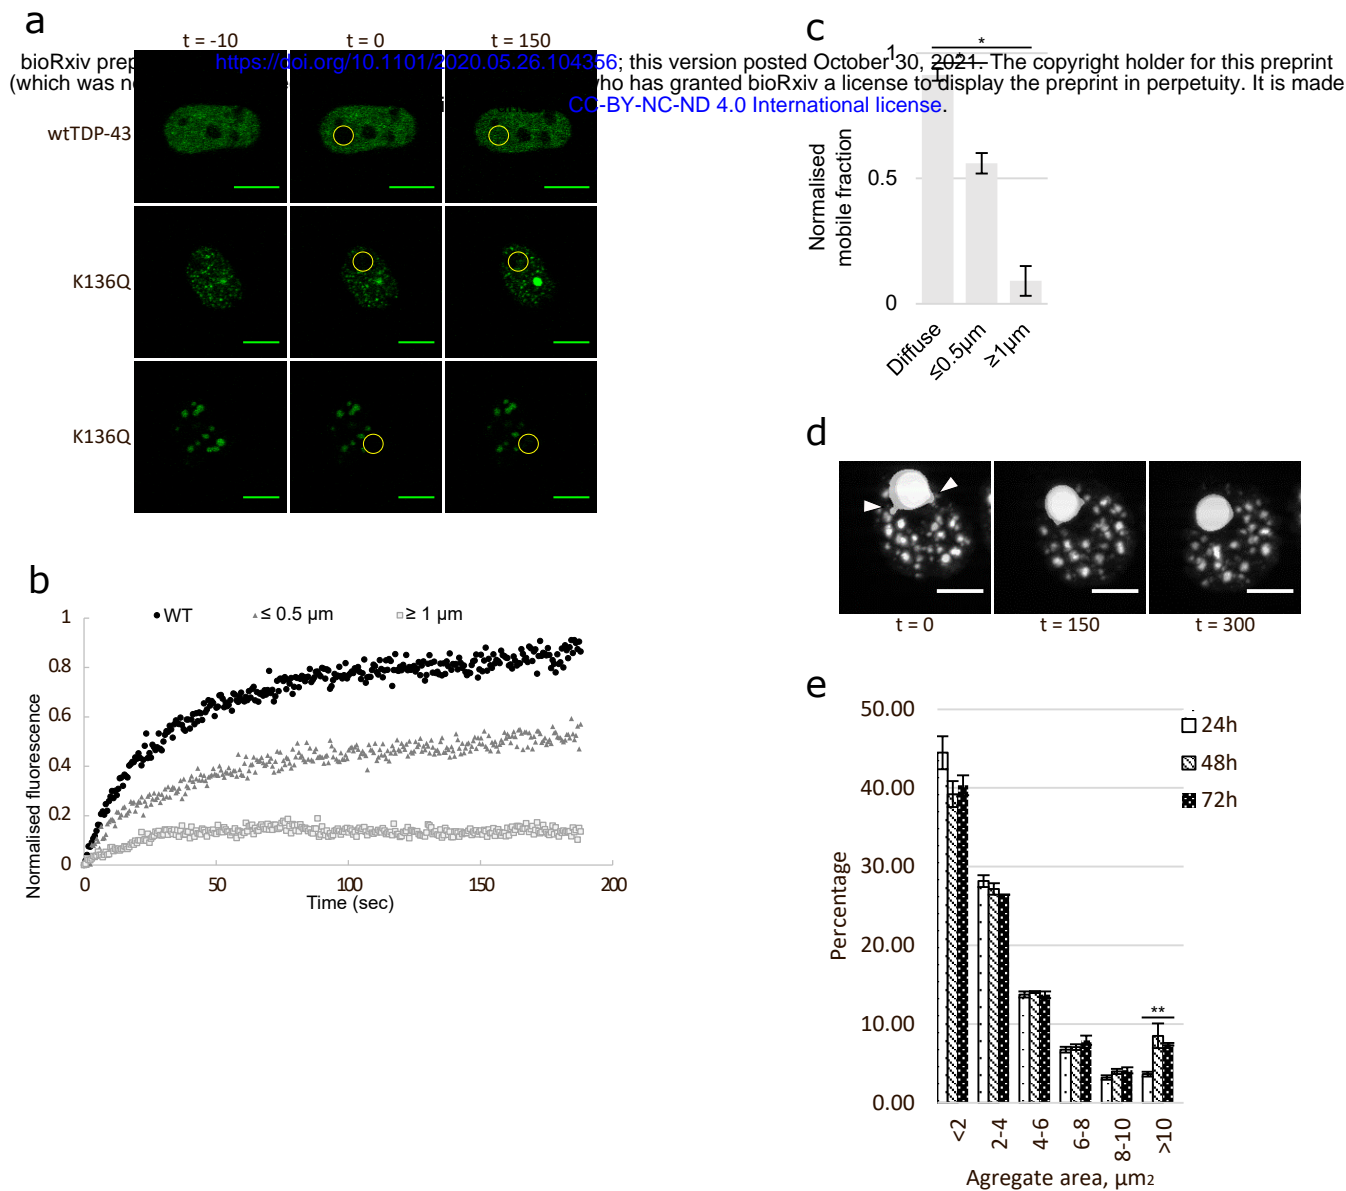



Figure 6

bioRxiv preprint doi: <https://doi.org/10.1101/2020.05.26.104356>; this version posted October 30, 2021. The copyright holder for this preprint (which was not certified by peer review) is the author/funder, who has granted bioRxiv a license to display the preprint in perpetuity. It is made available under aCC-BY-NC-ND 4.0 International license.

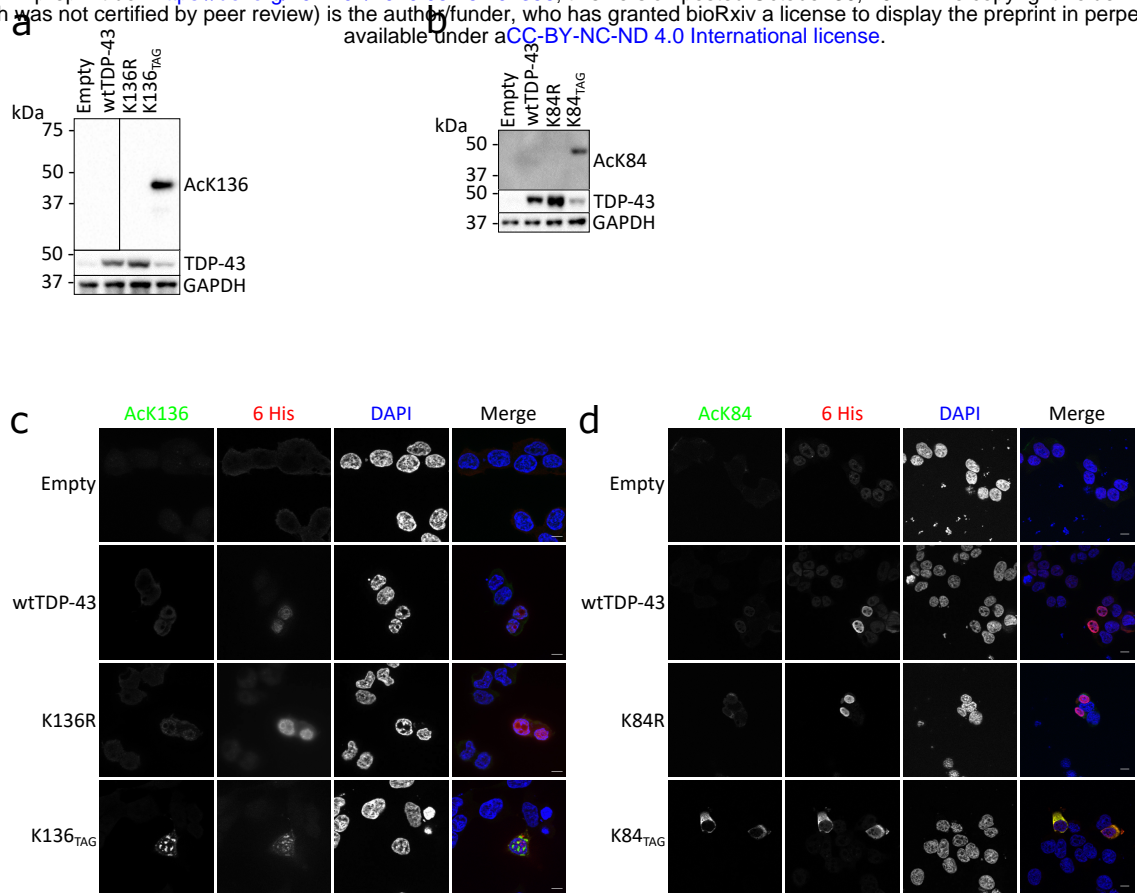

Figure 7

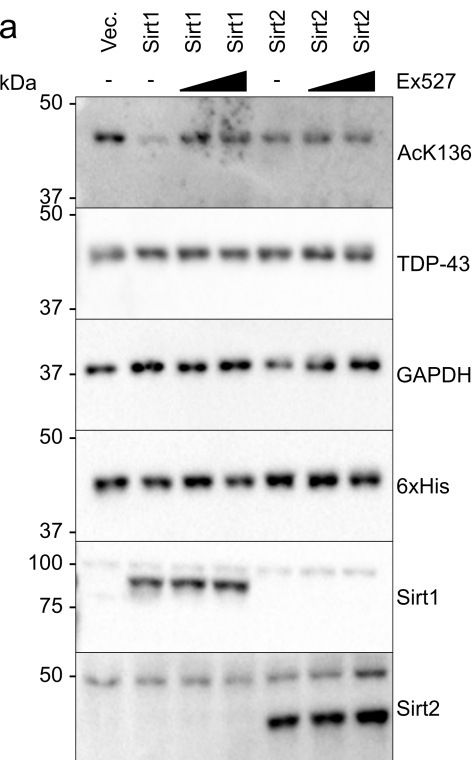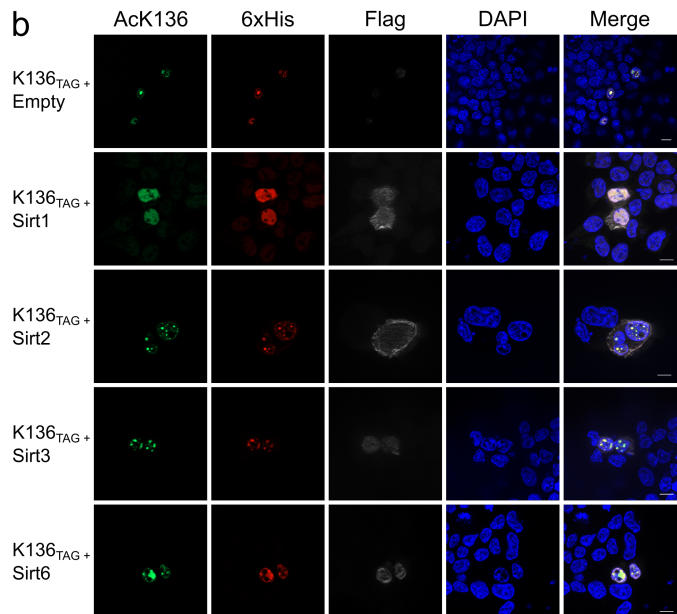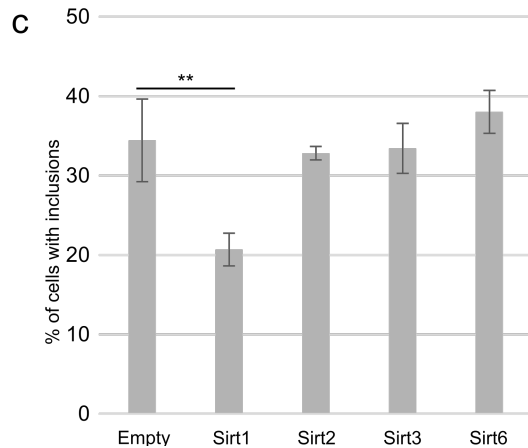

Source: https://www.biorxiv.org/content/10.1101/2020.05.26.104356v3.full.pdf
